# Supplementary material for: A-to-I RNA editing across consensus molecular subtypes of colon cancer: biological insights and prognostic model
Source: Research Square preprint supplement (doi:10.21203/rs.3.rs-7589367/v1), 2025-10-31
Supplement: Supplementary file 1 [file 878cc2fe12c894e2d3850bed.docx]

Supplementary

Deconvolution Results:

*Cibersortx:
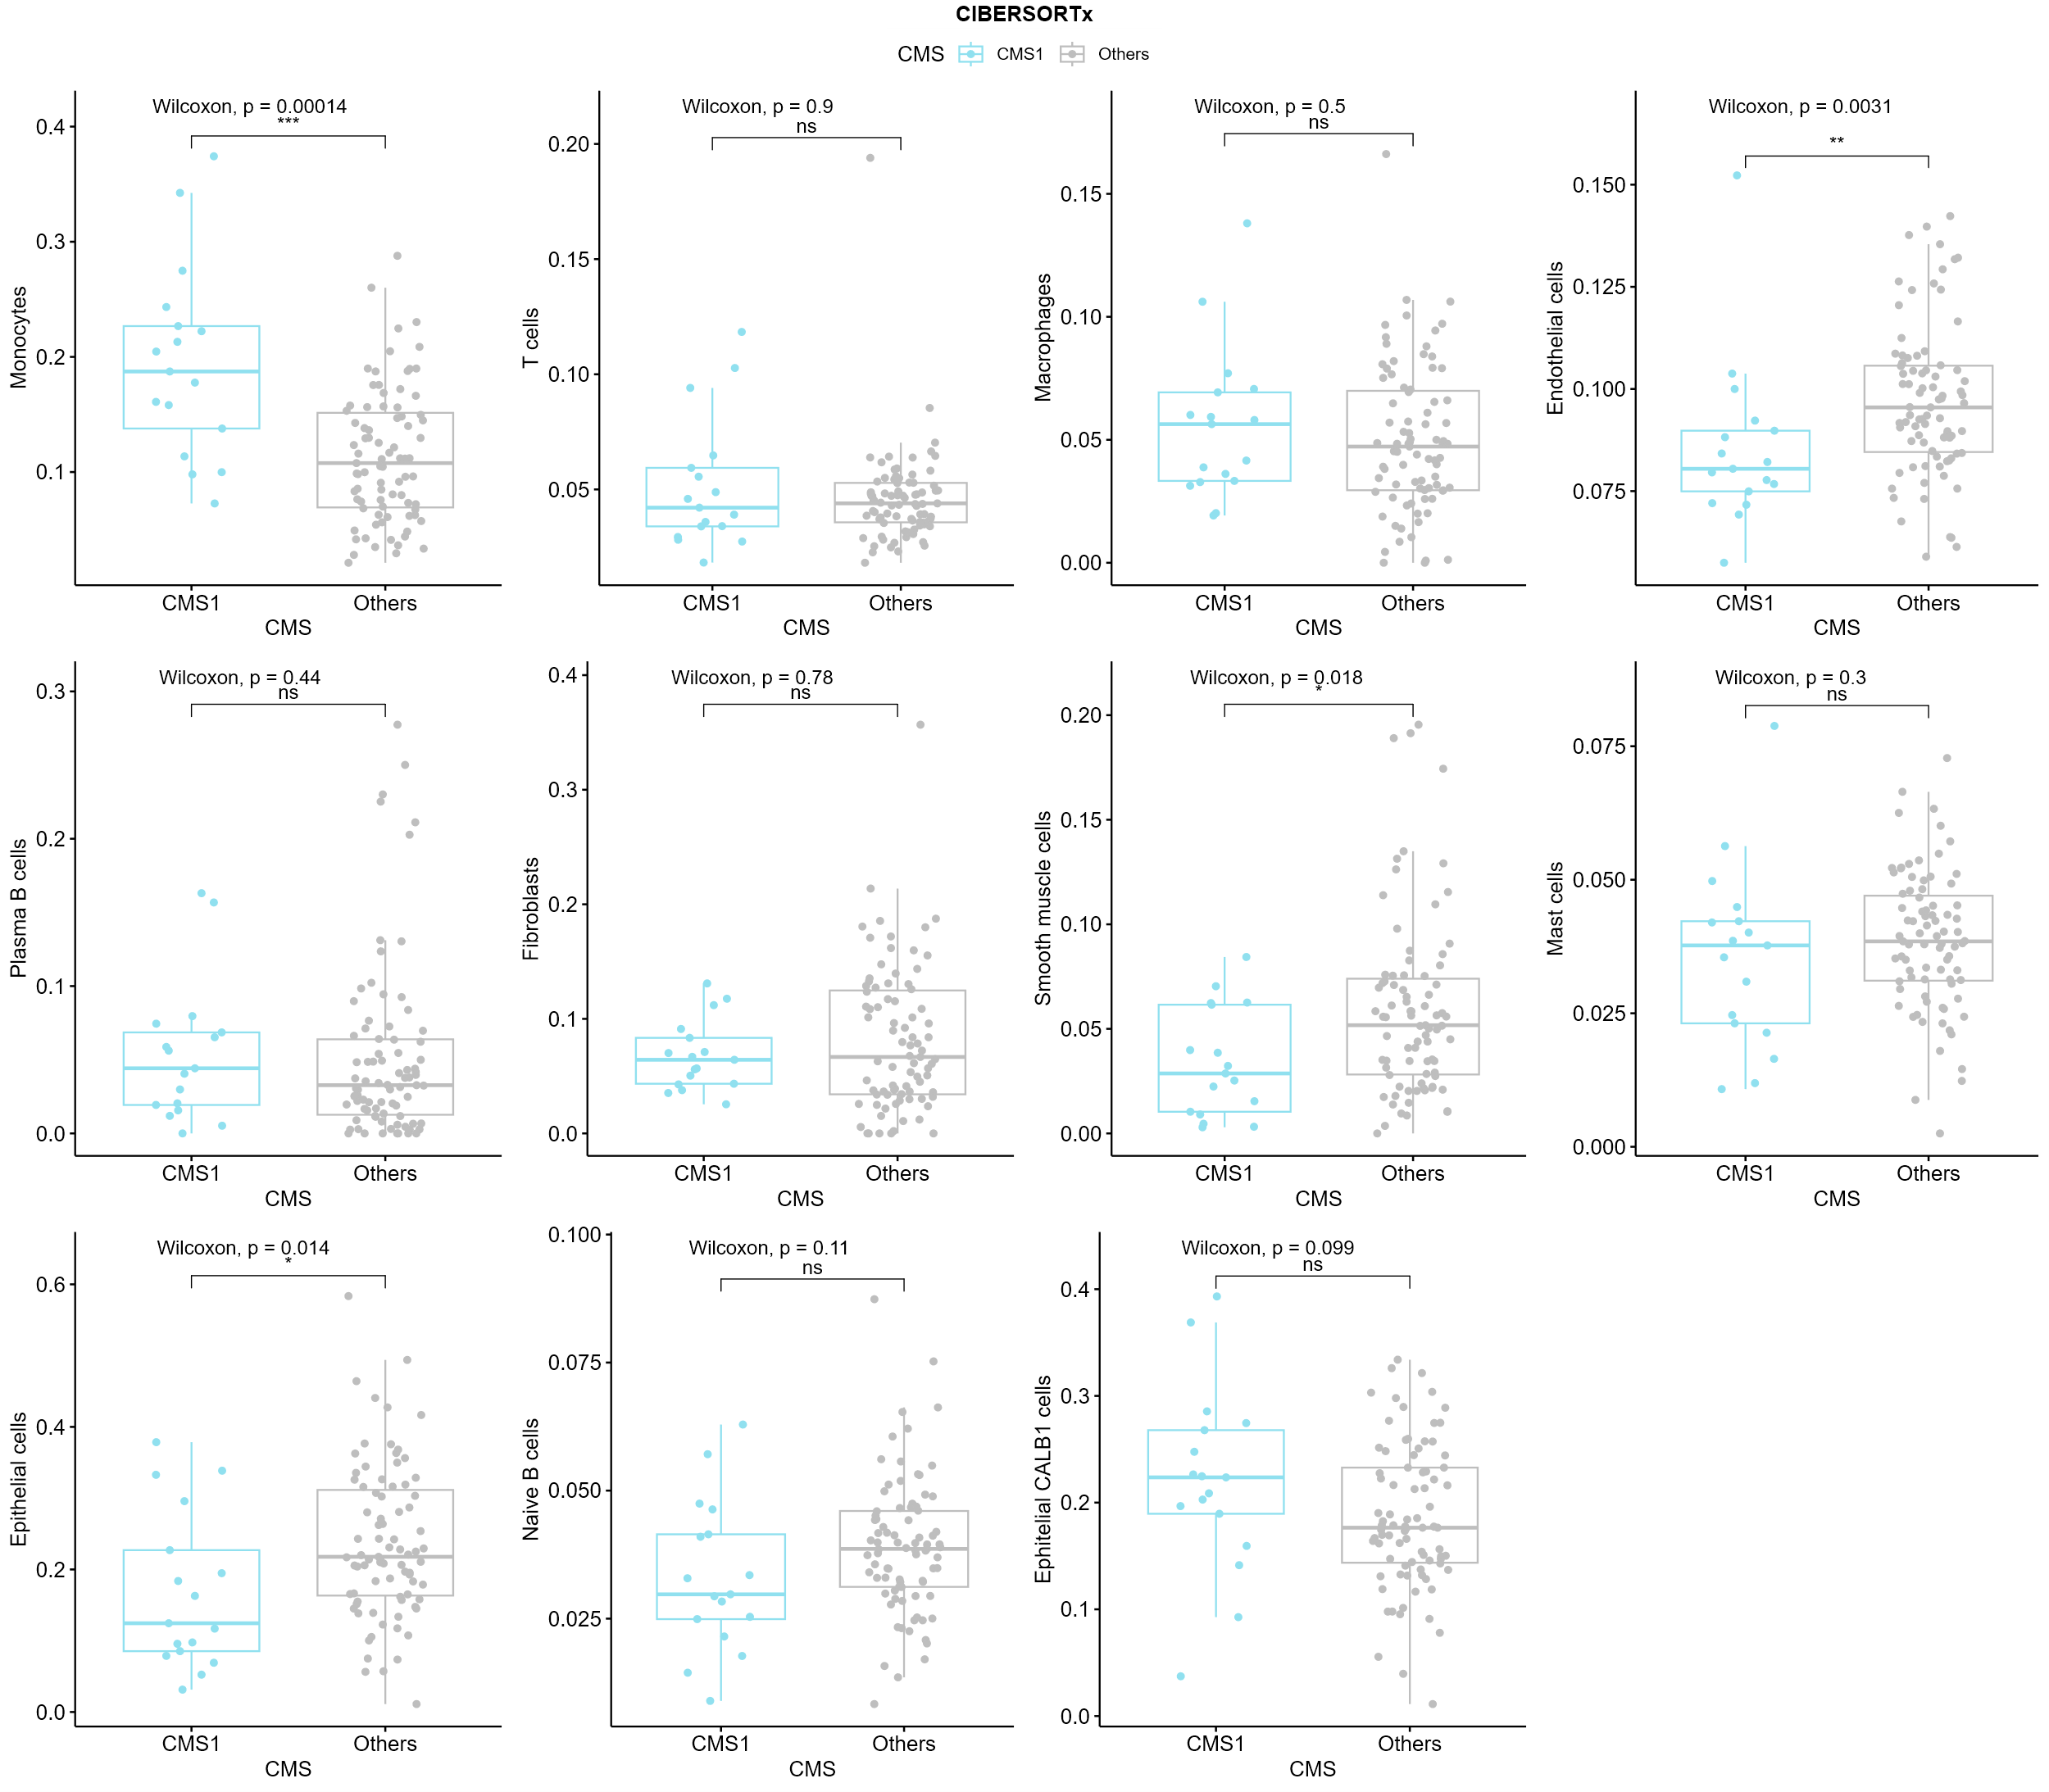
*

Supplementary 1 **CIBERSORTx** statistical comparison of cell type proportions in CMS1 versus others.


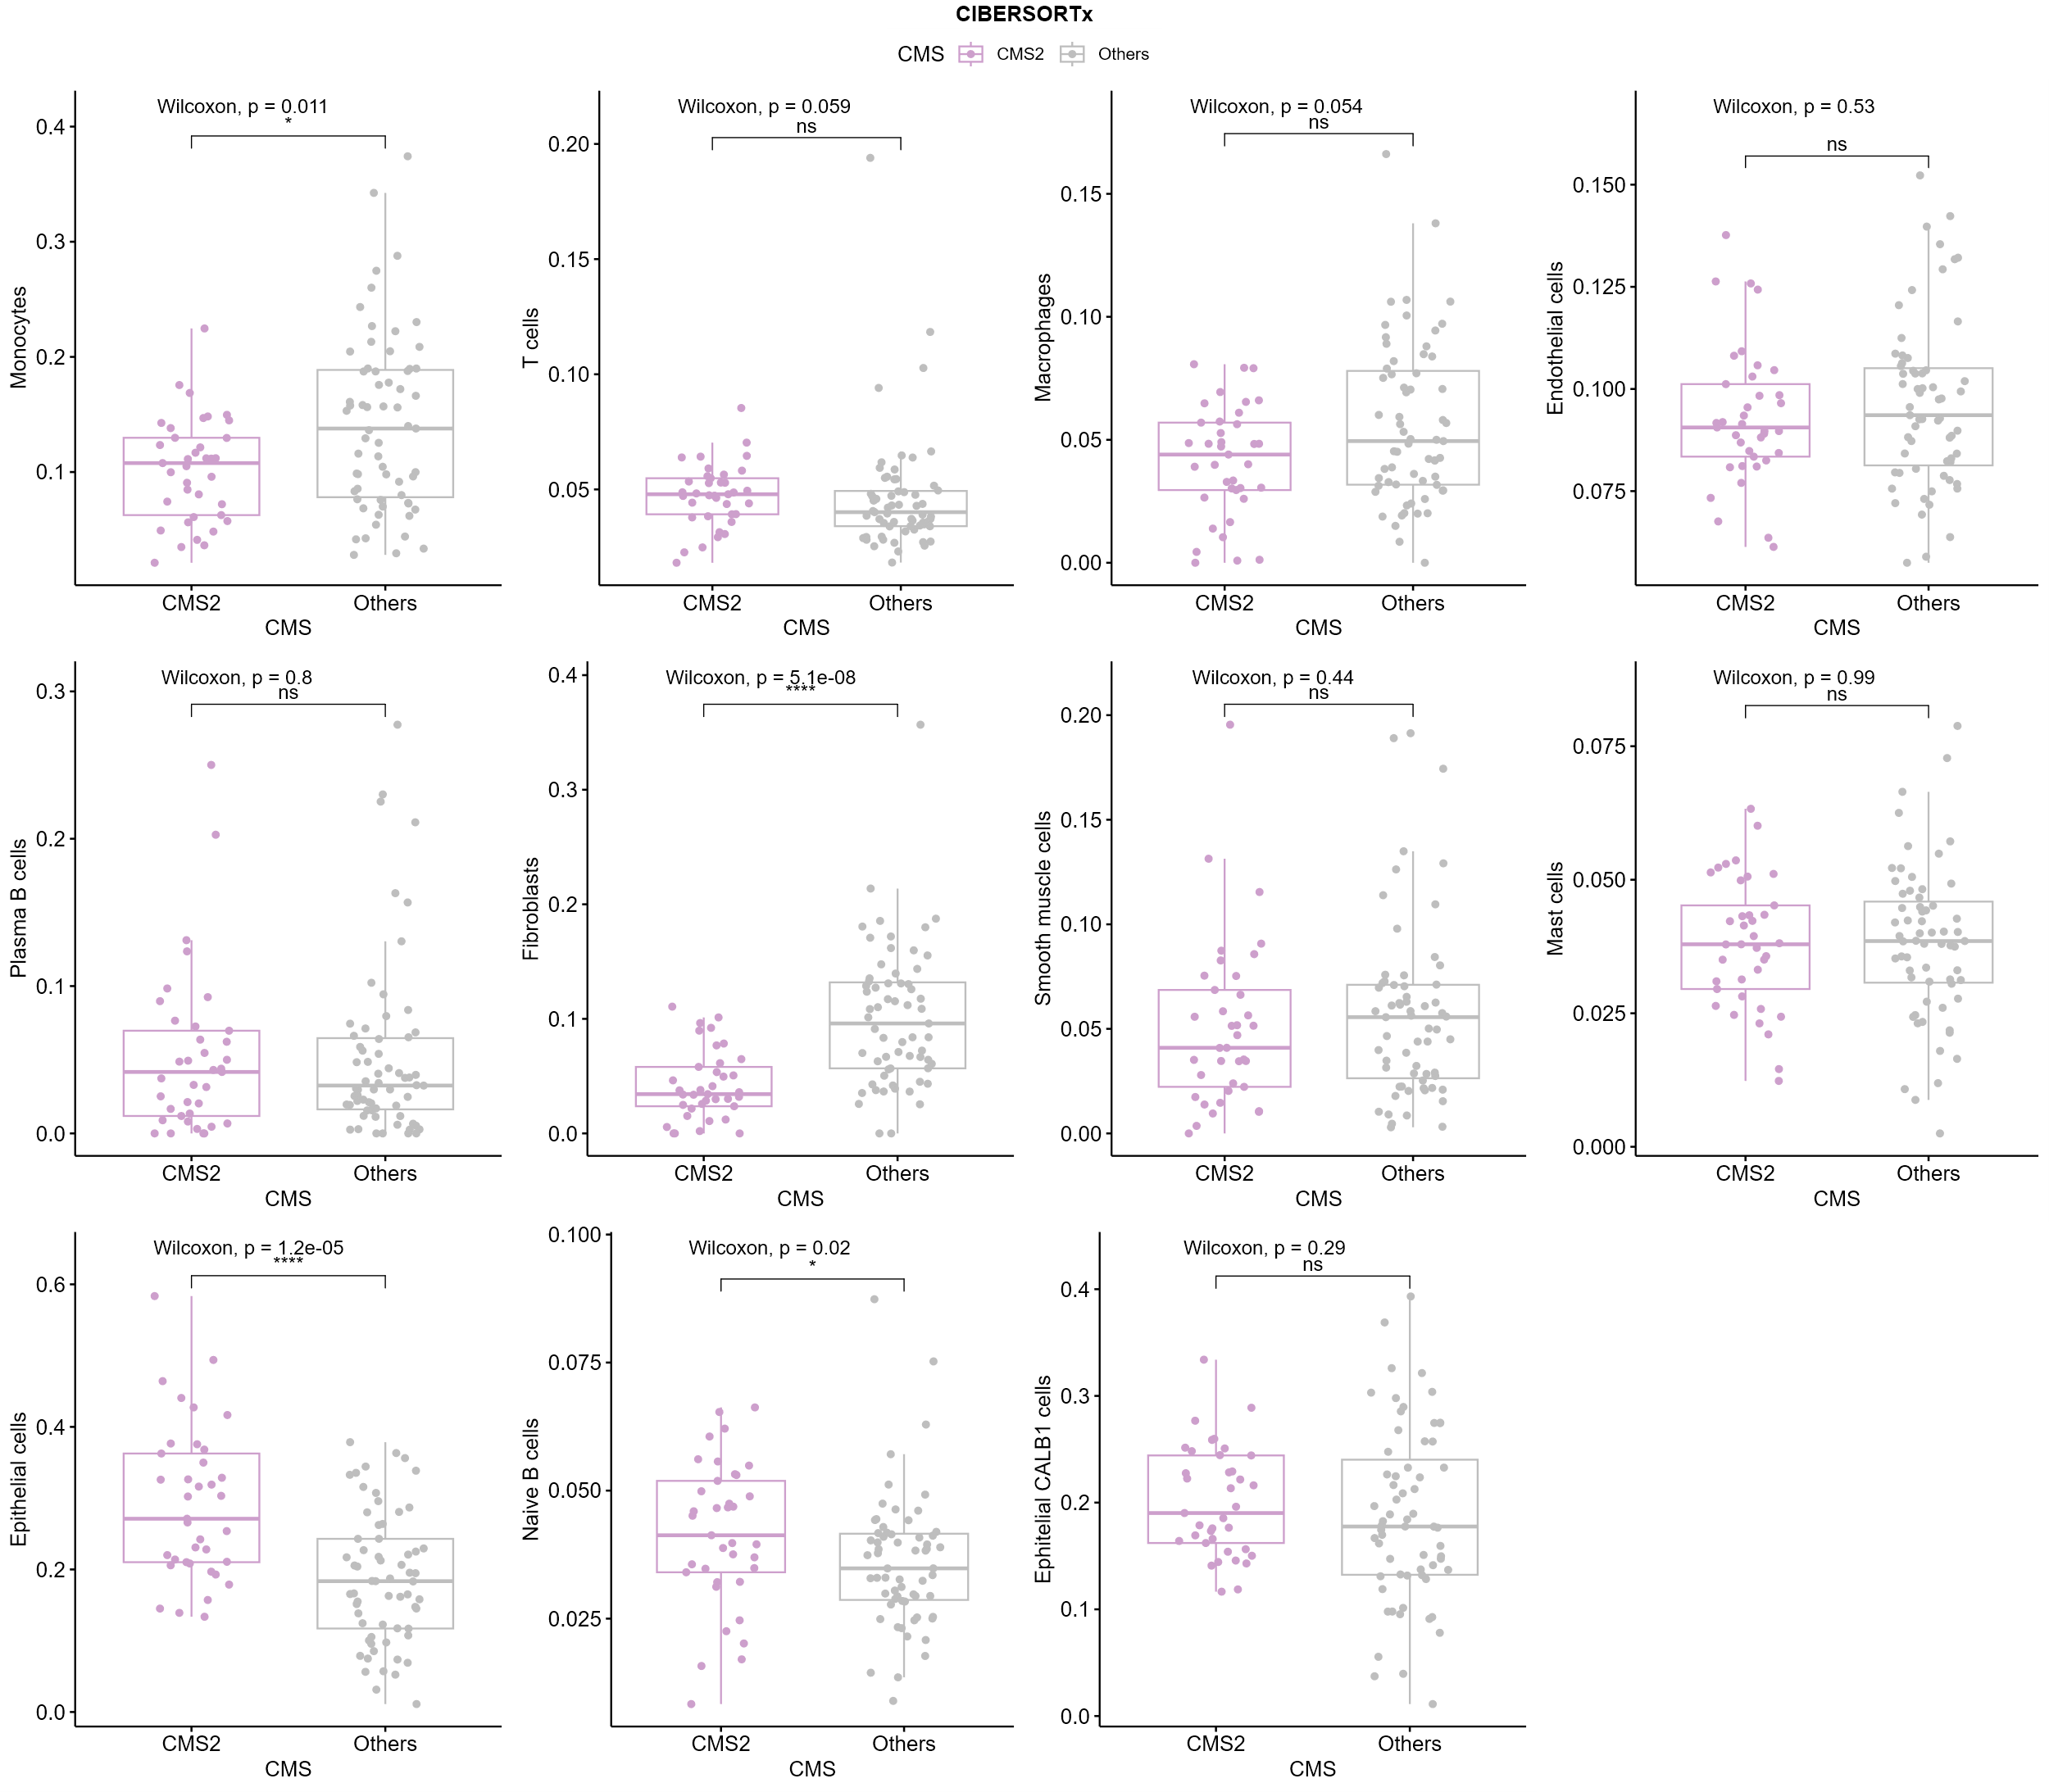


Supplementary 2 **CIBERSORTx** statistical comparison of cell type proportions in CMS2 versus others.


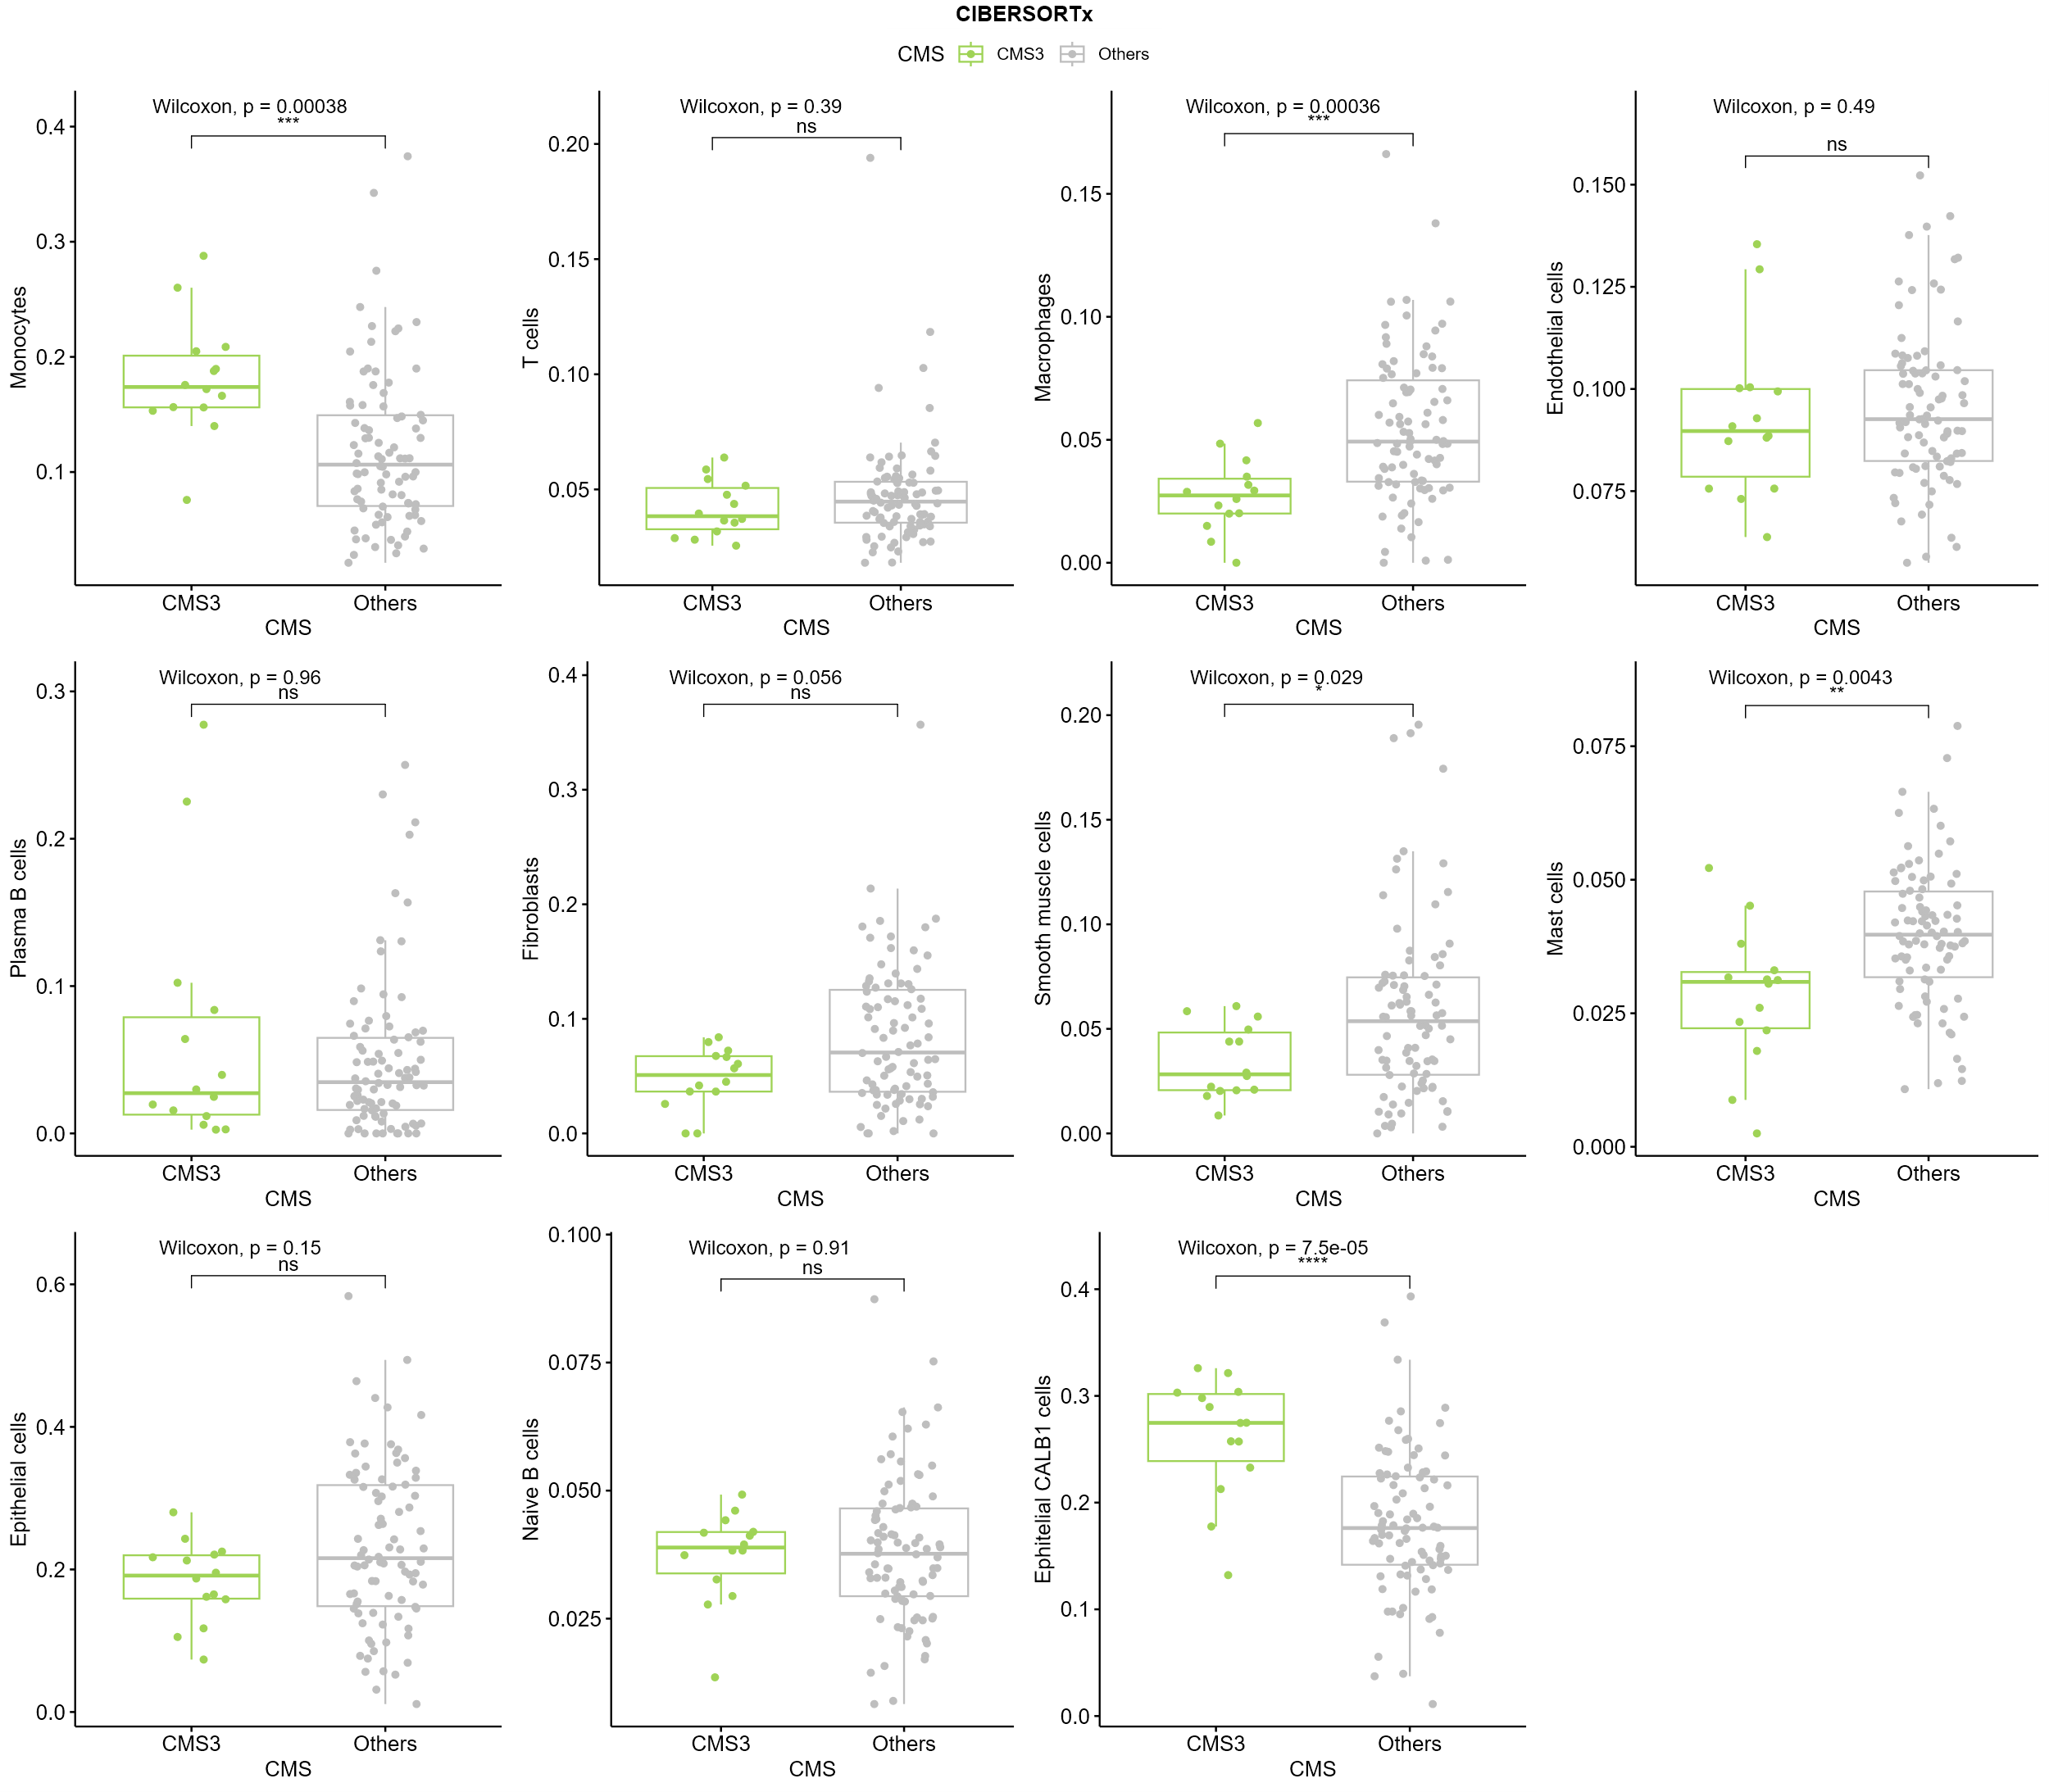


Supplementary 3 **CIBERSORTx** statistical comparison of cell type proportions in CMS3 versus others.


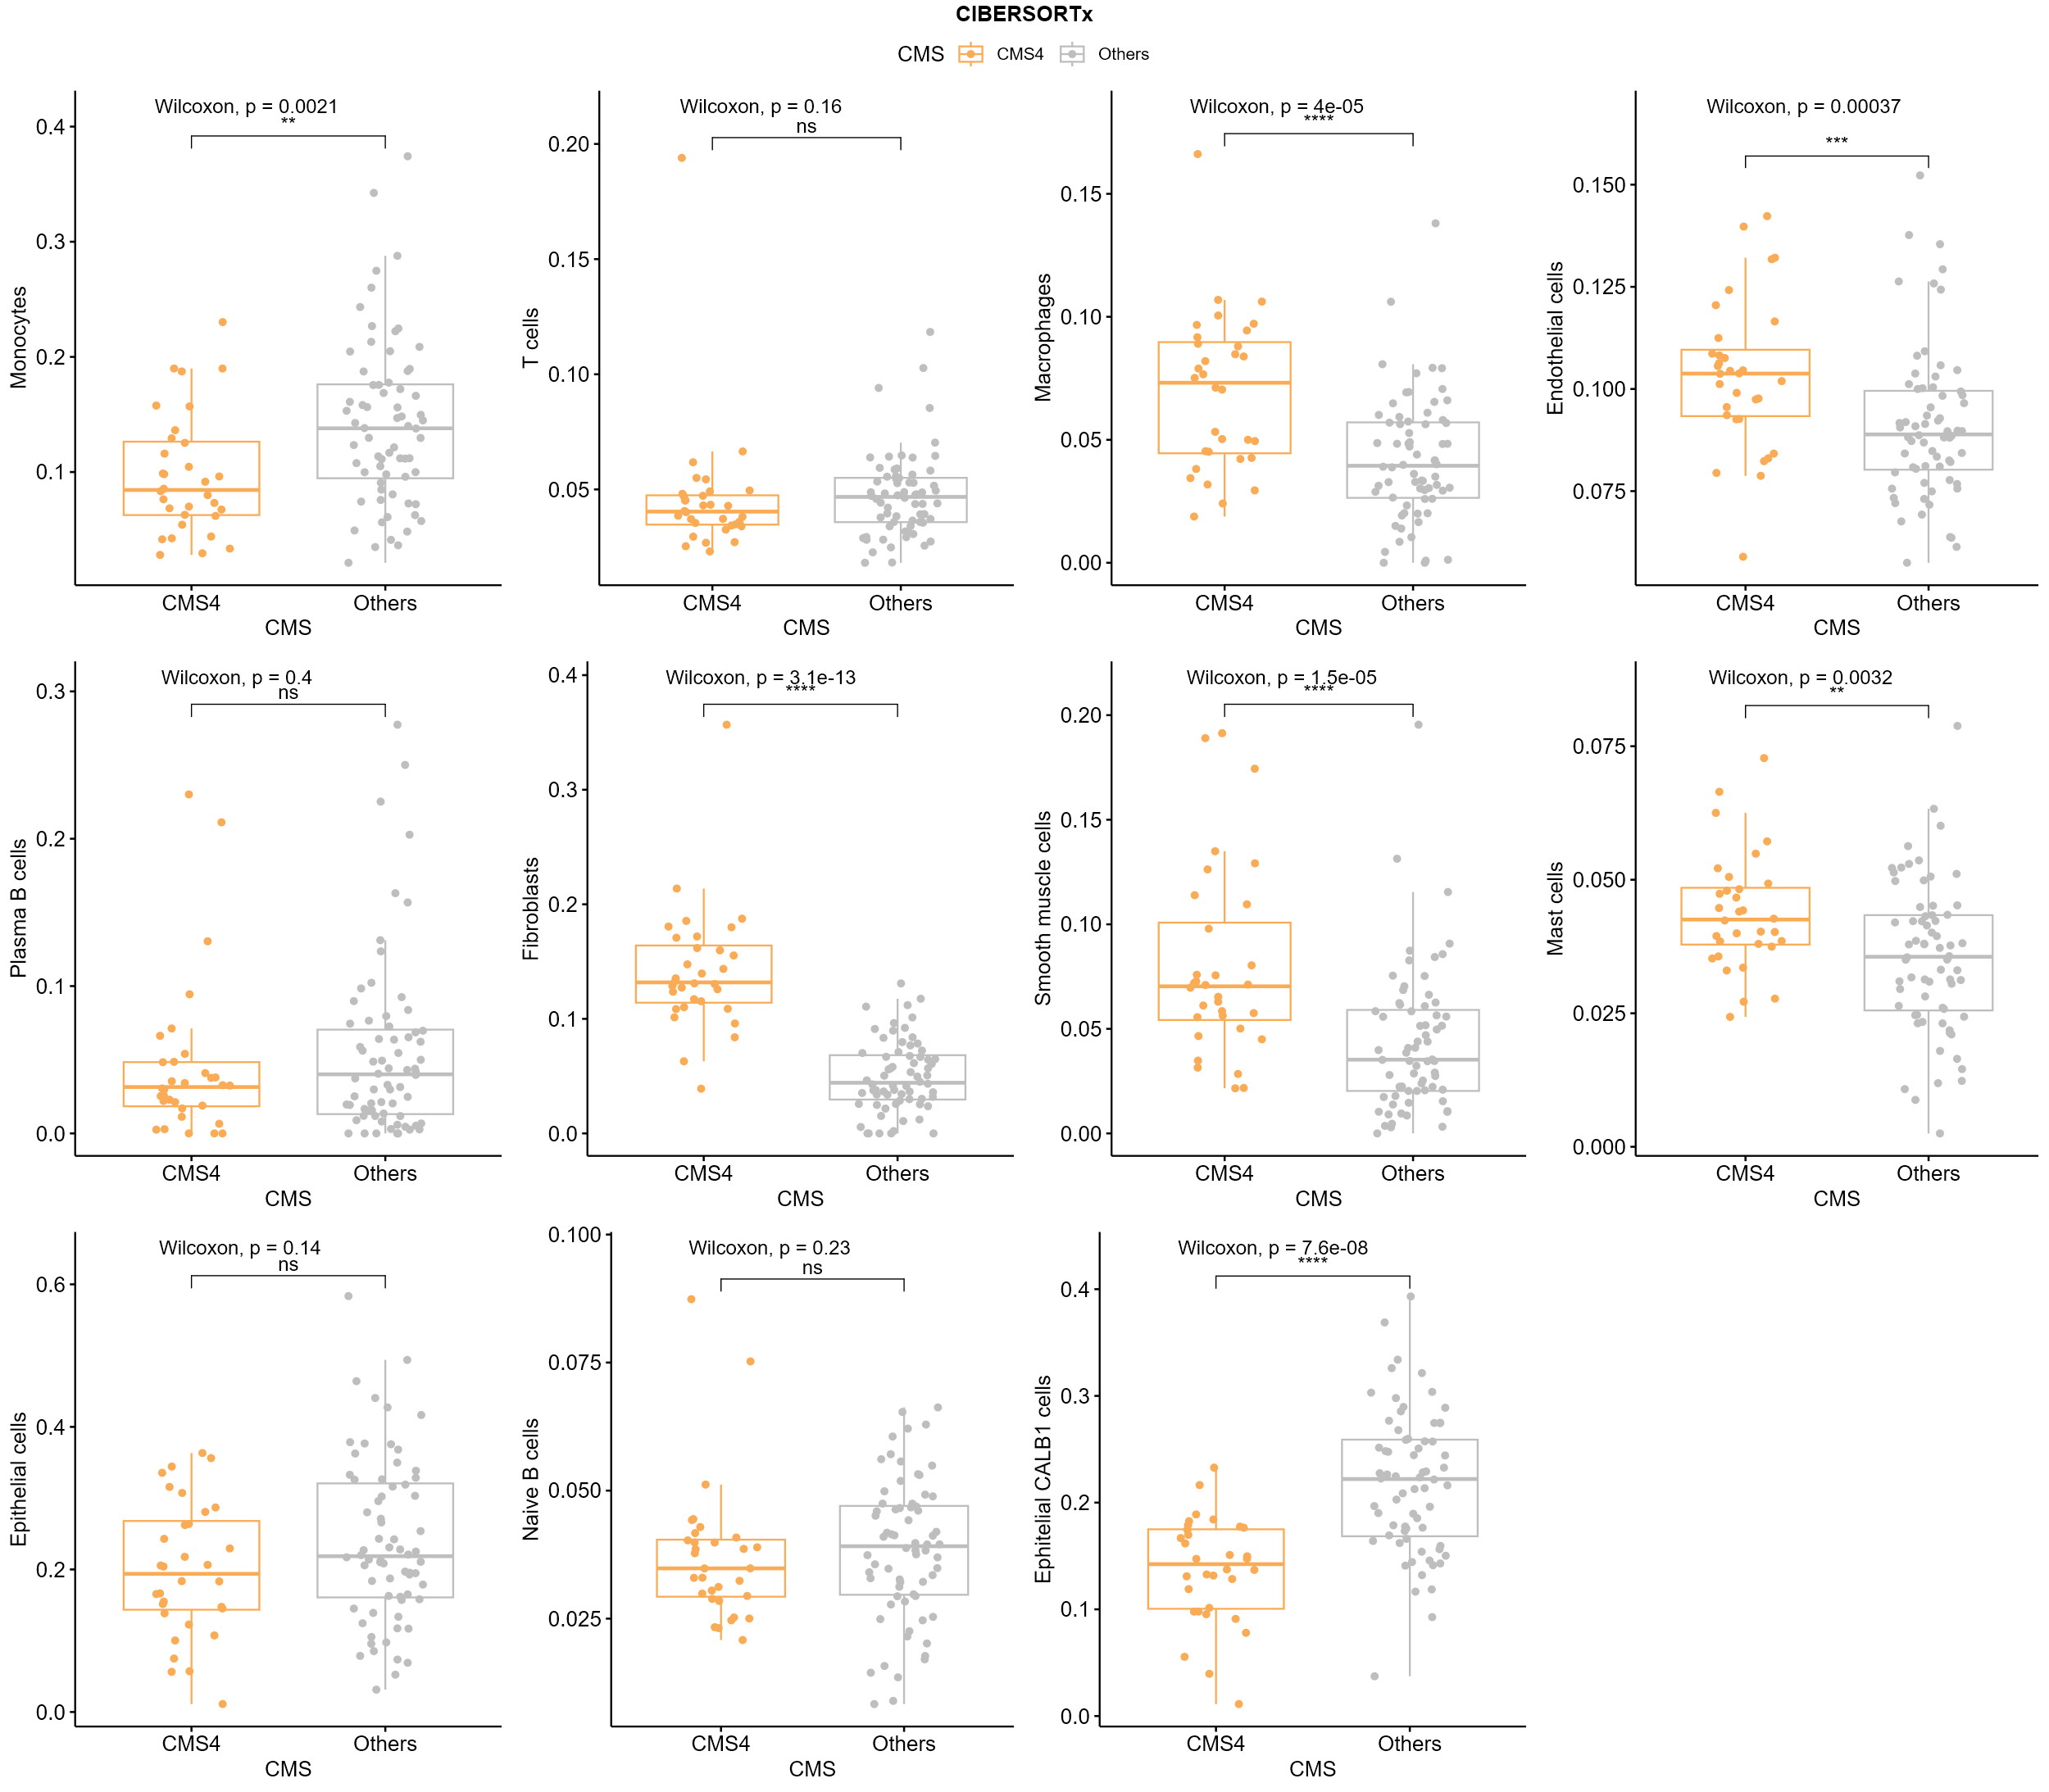


Supplementary 4 **CIBERSORTx** statistical comparison of cell type proportions in CMS4 versus others;

*MuSIC:*


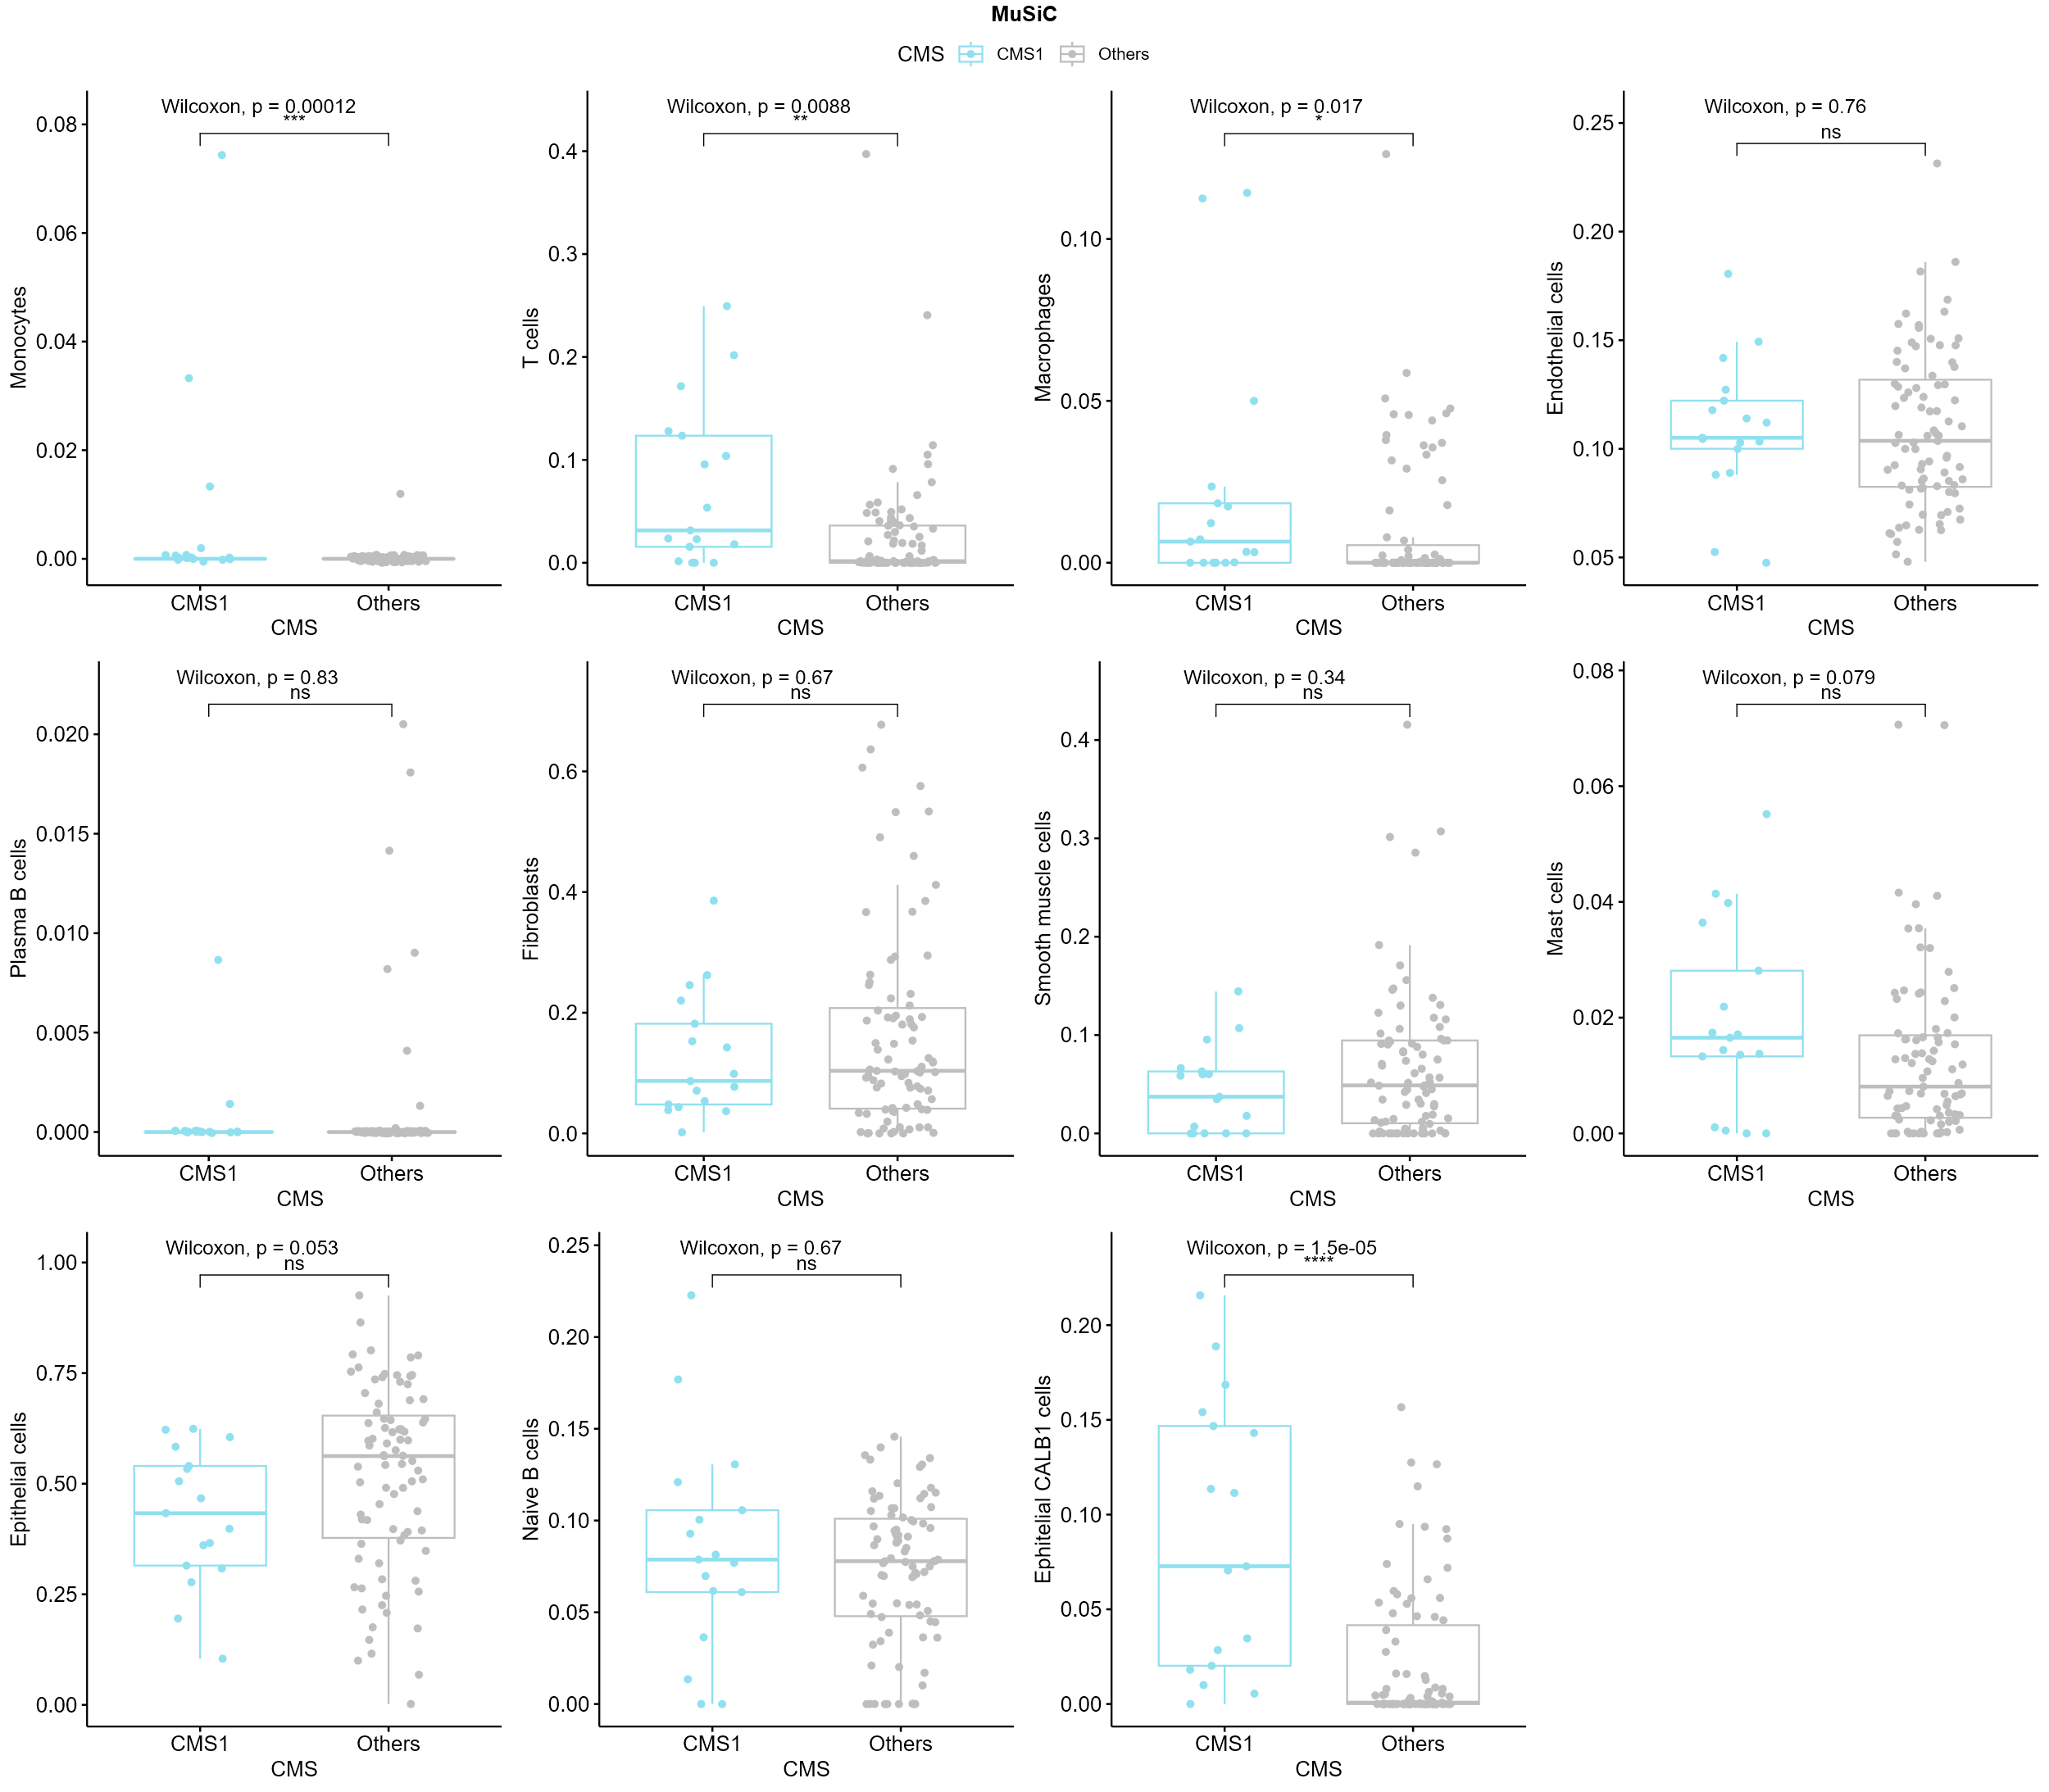


Supplementary 5 **MuSIC** statistical comparison of cell type proportions in CMS1 versus others;


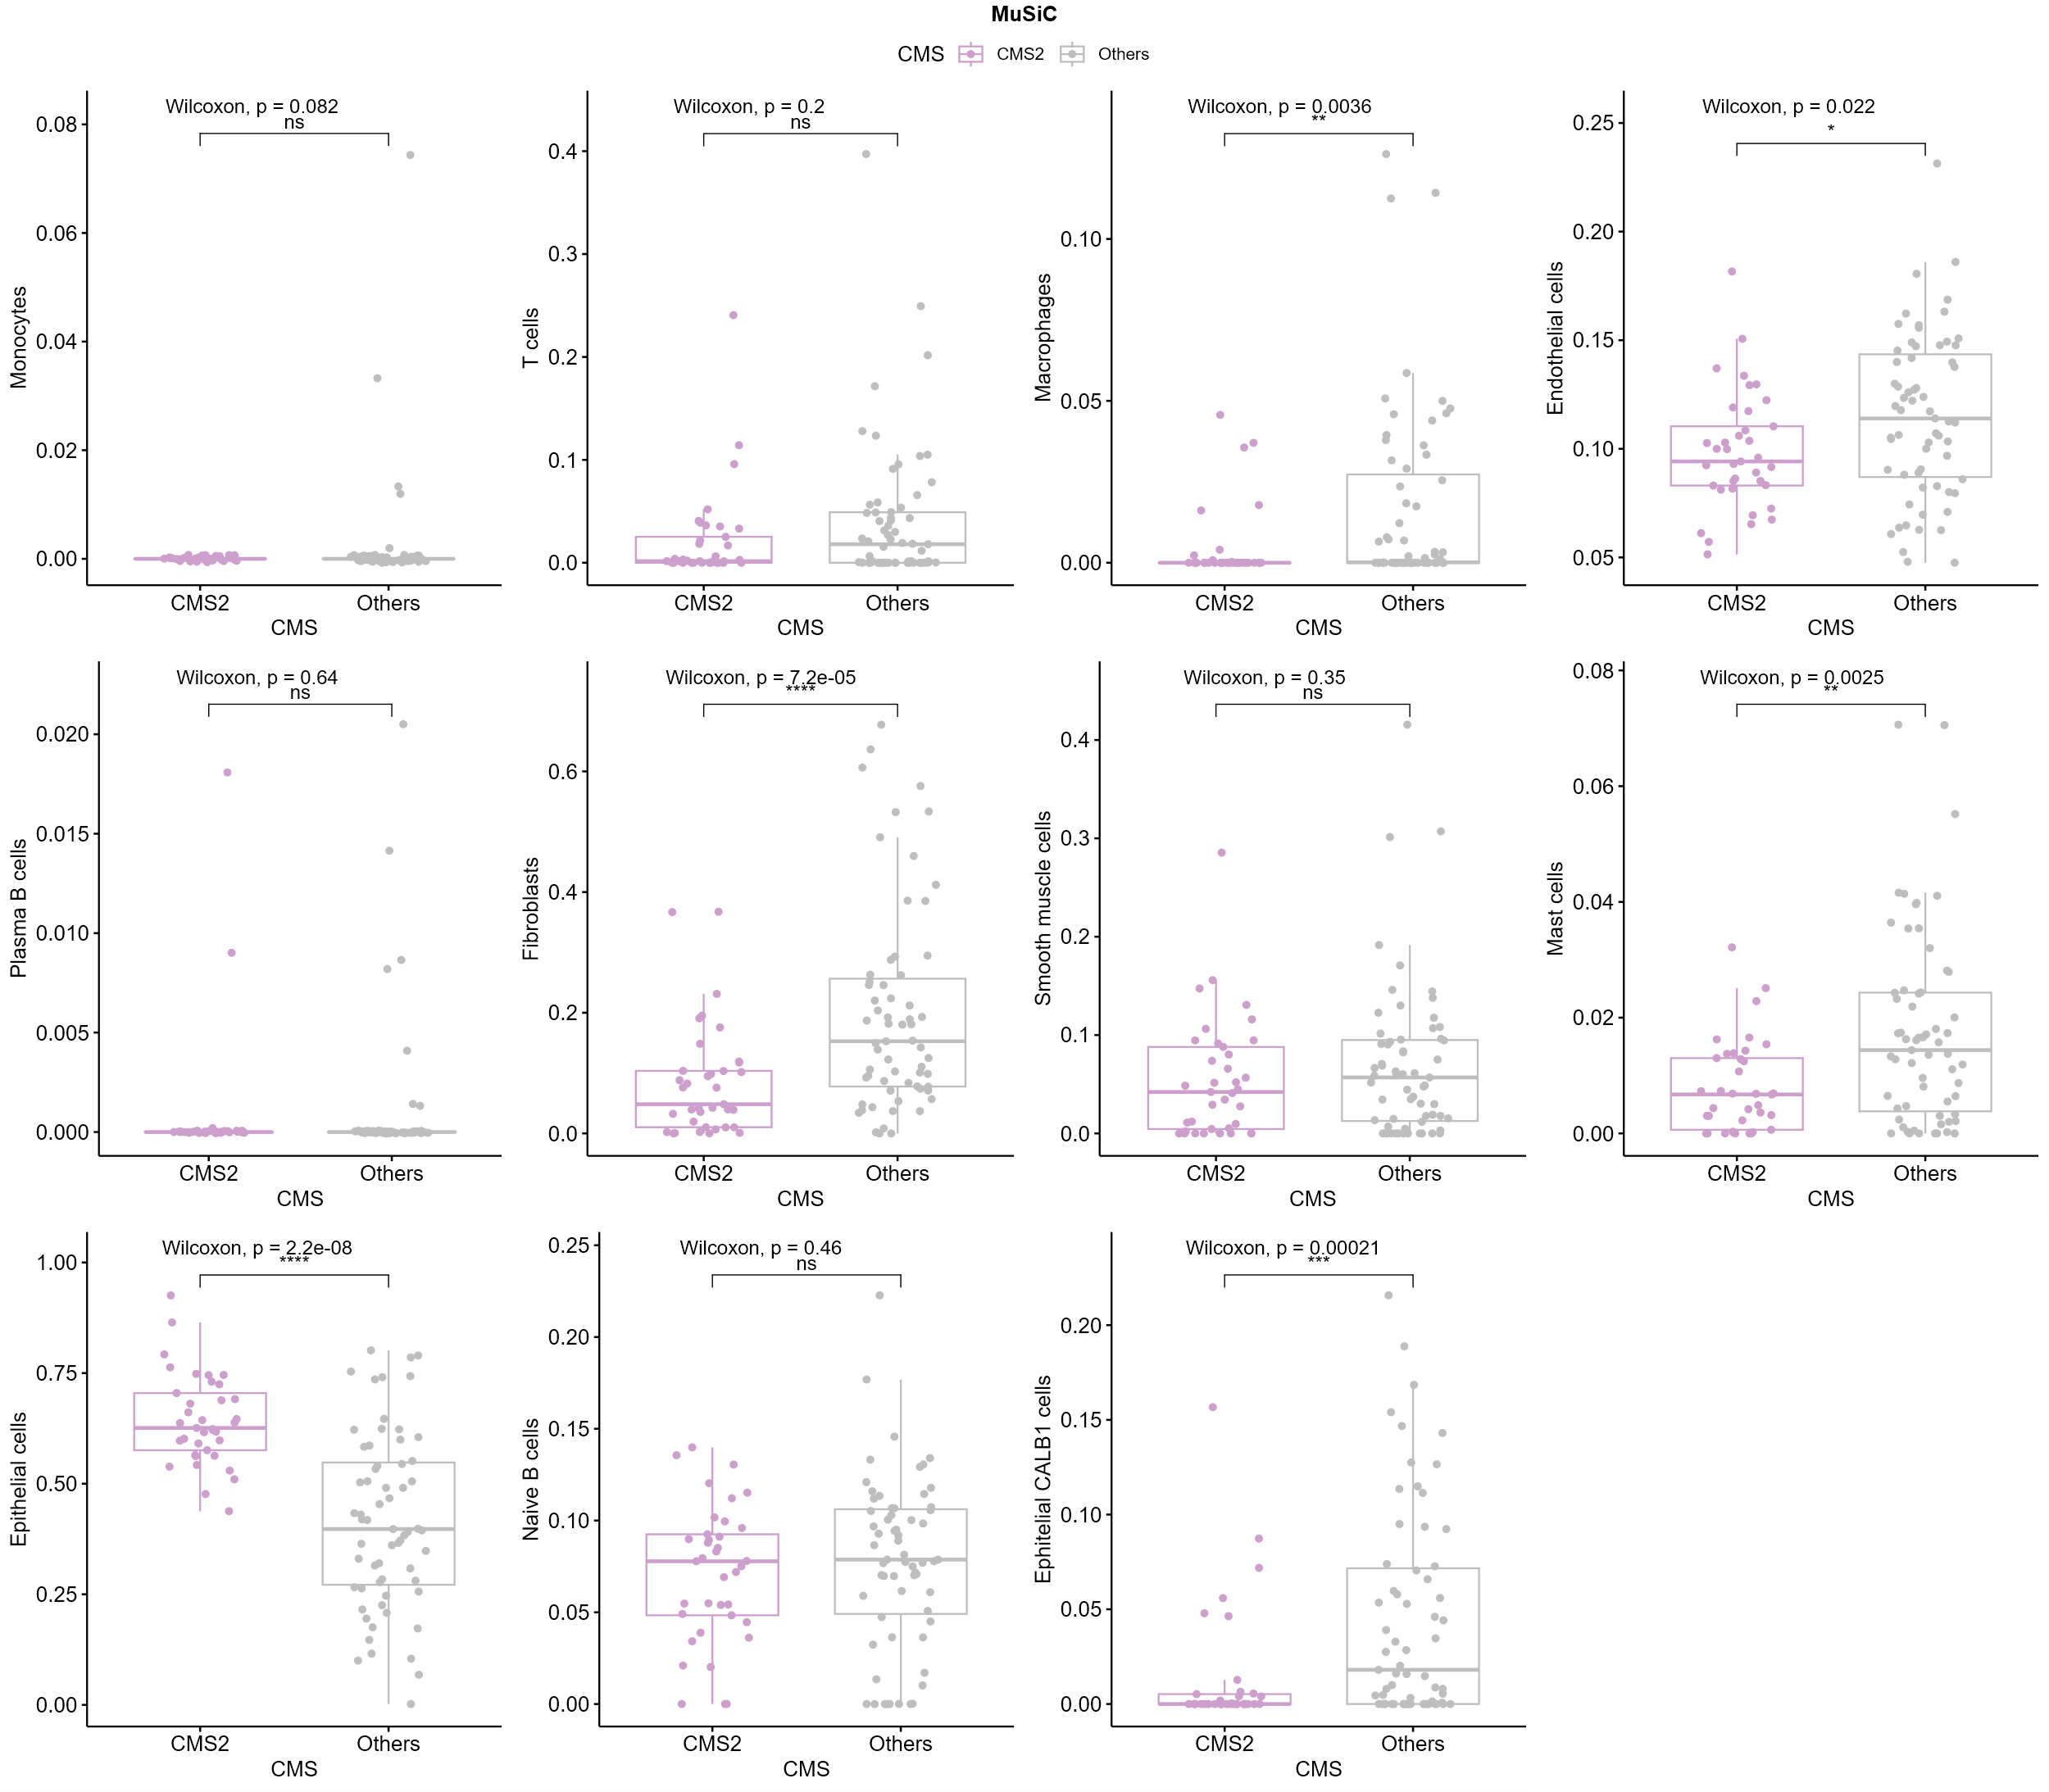


Supplementary 6 MuSIC statistical comparison of cell type proportions in CMS2 versus others;


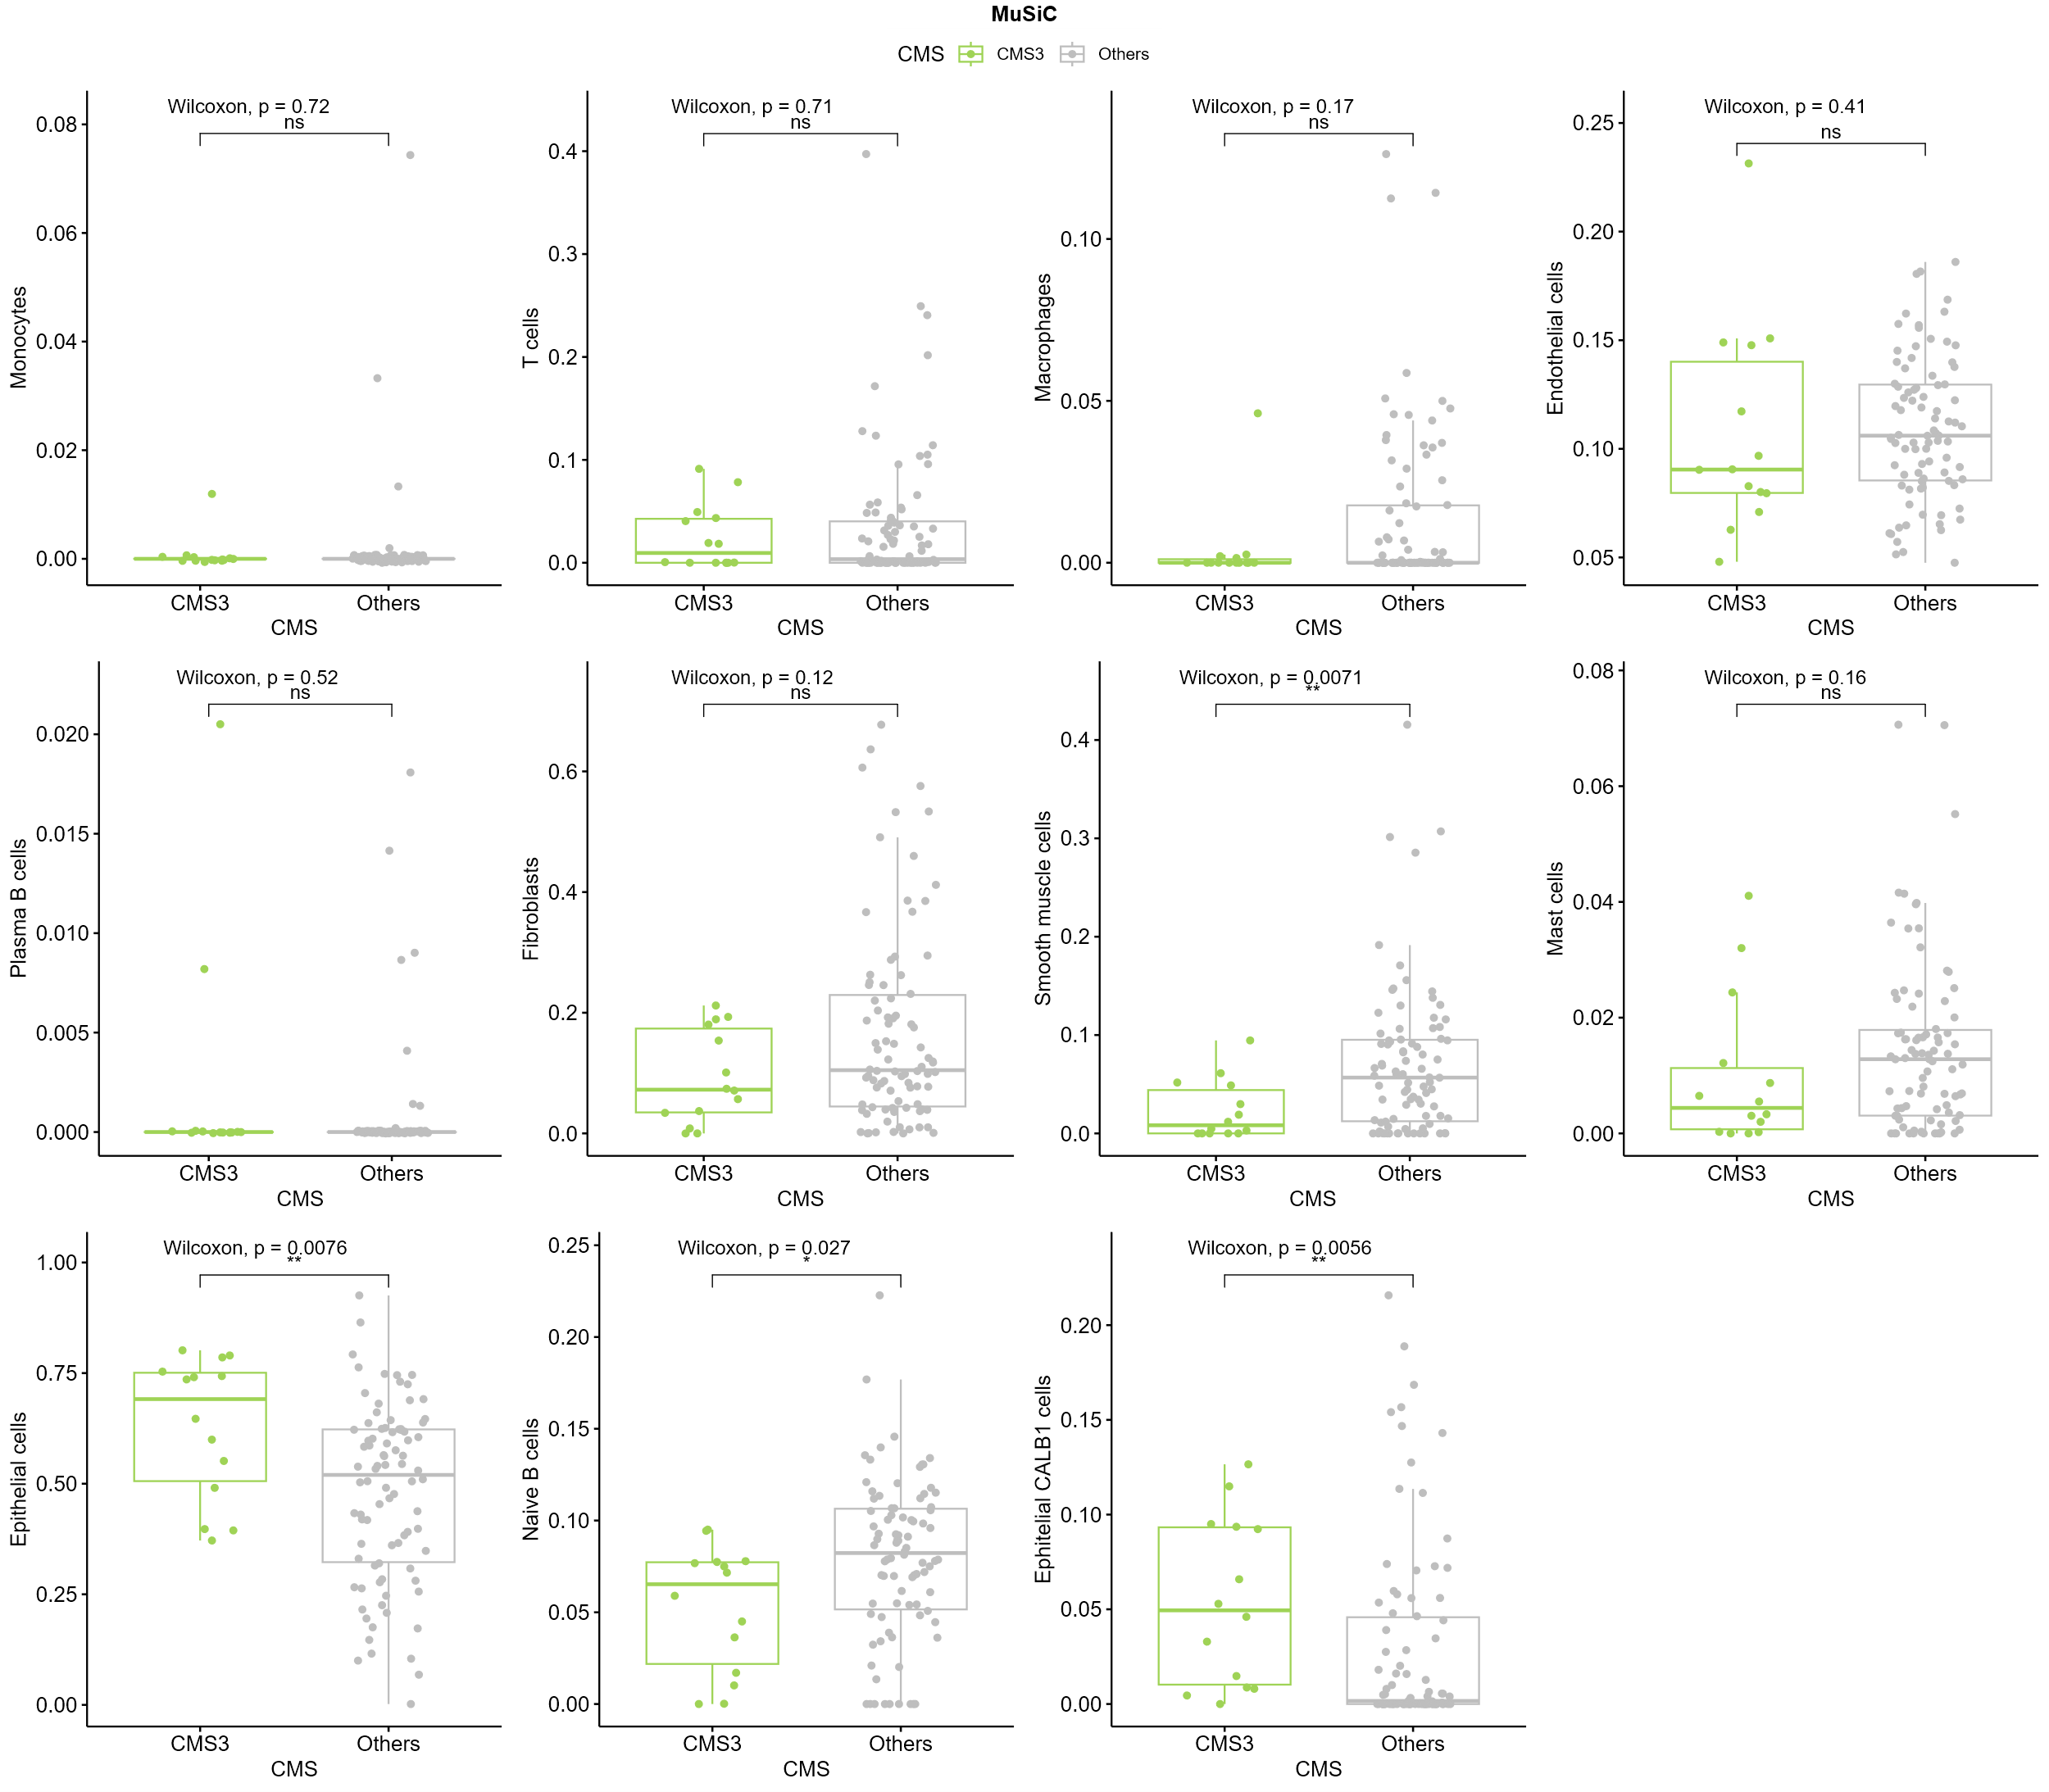


Supplementary 7 MuSIC statistical comparison of cell type proportions in CMS3 versus others;


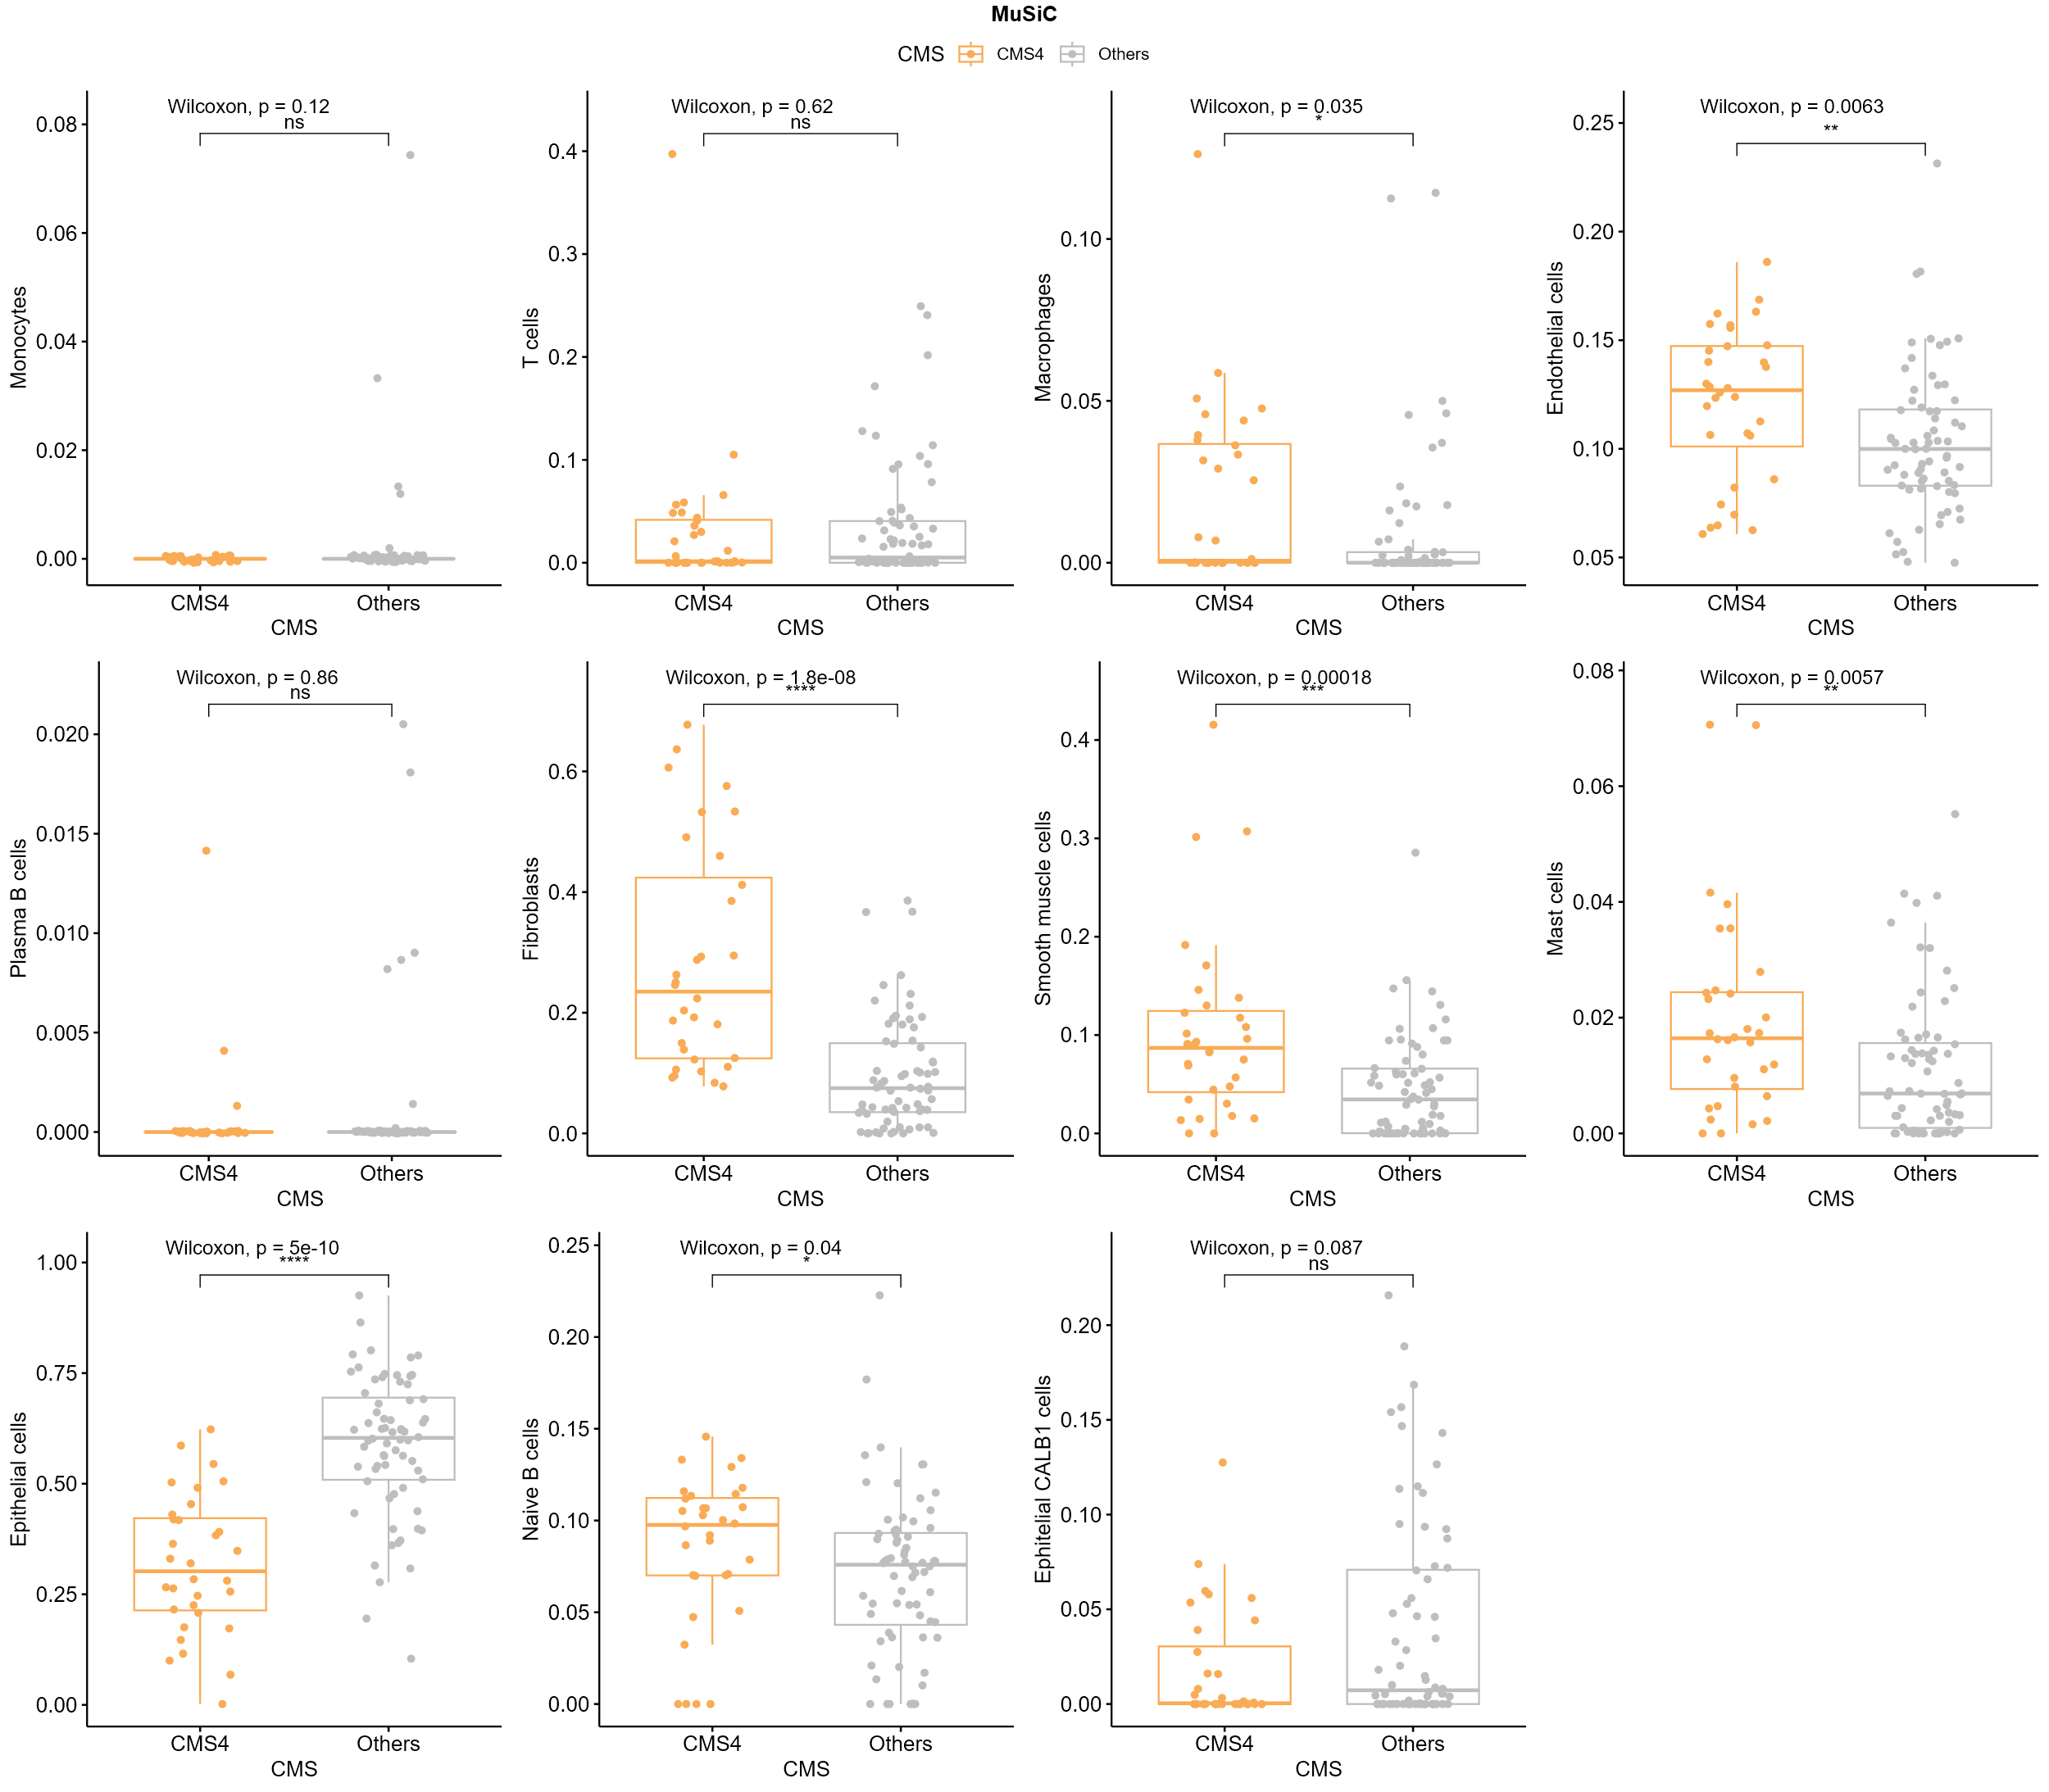


Supplementary 8 MuSIC statistical comparison of cell type proportions in CMS4 versus others;

*Bayes Prism:*

*
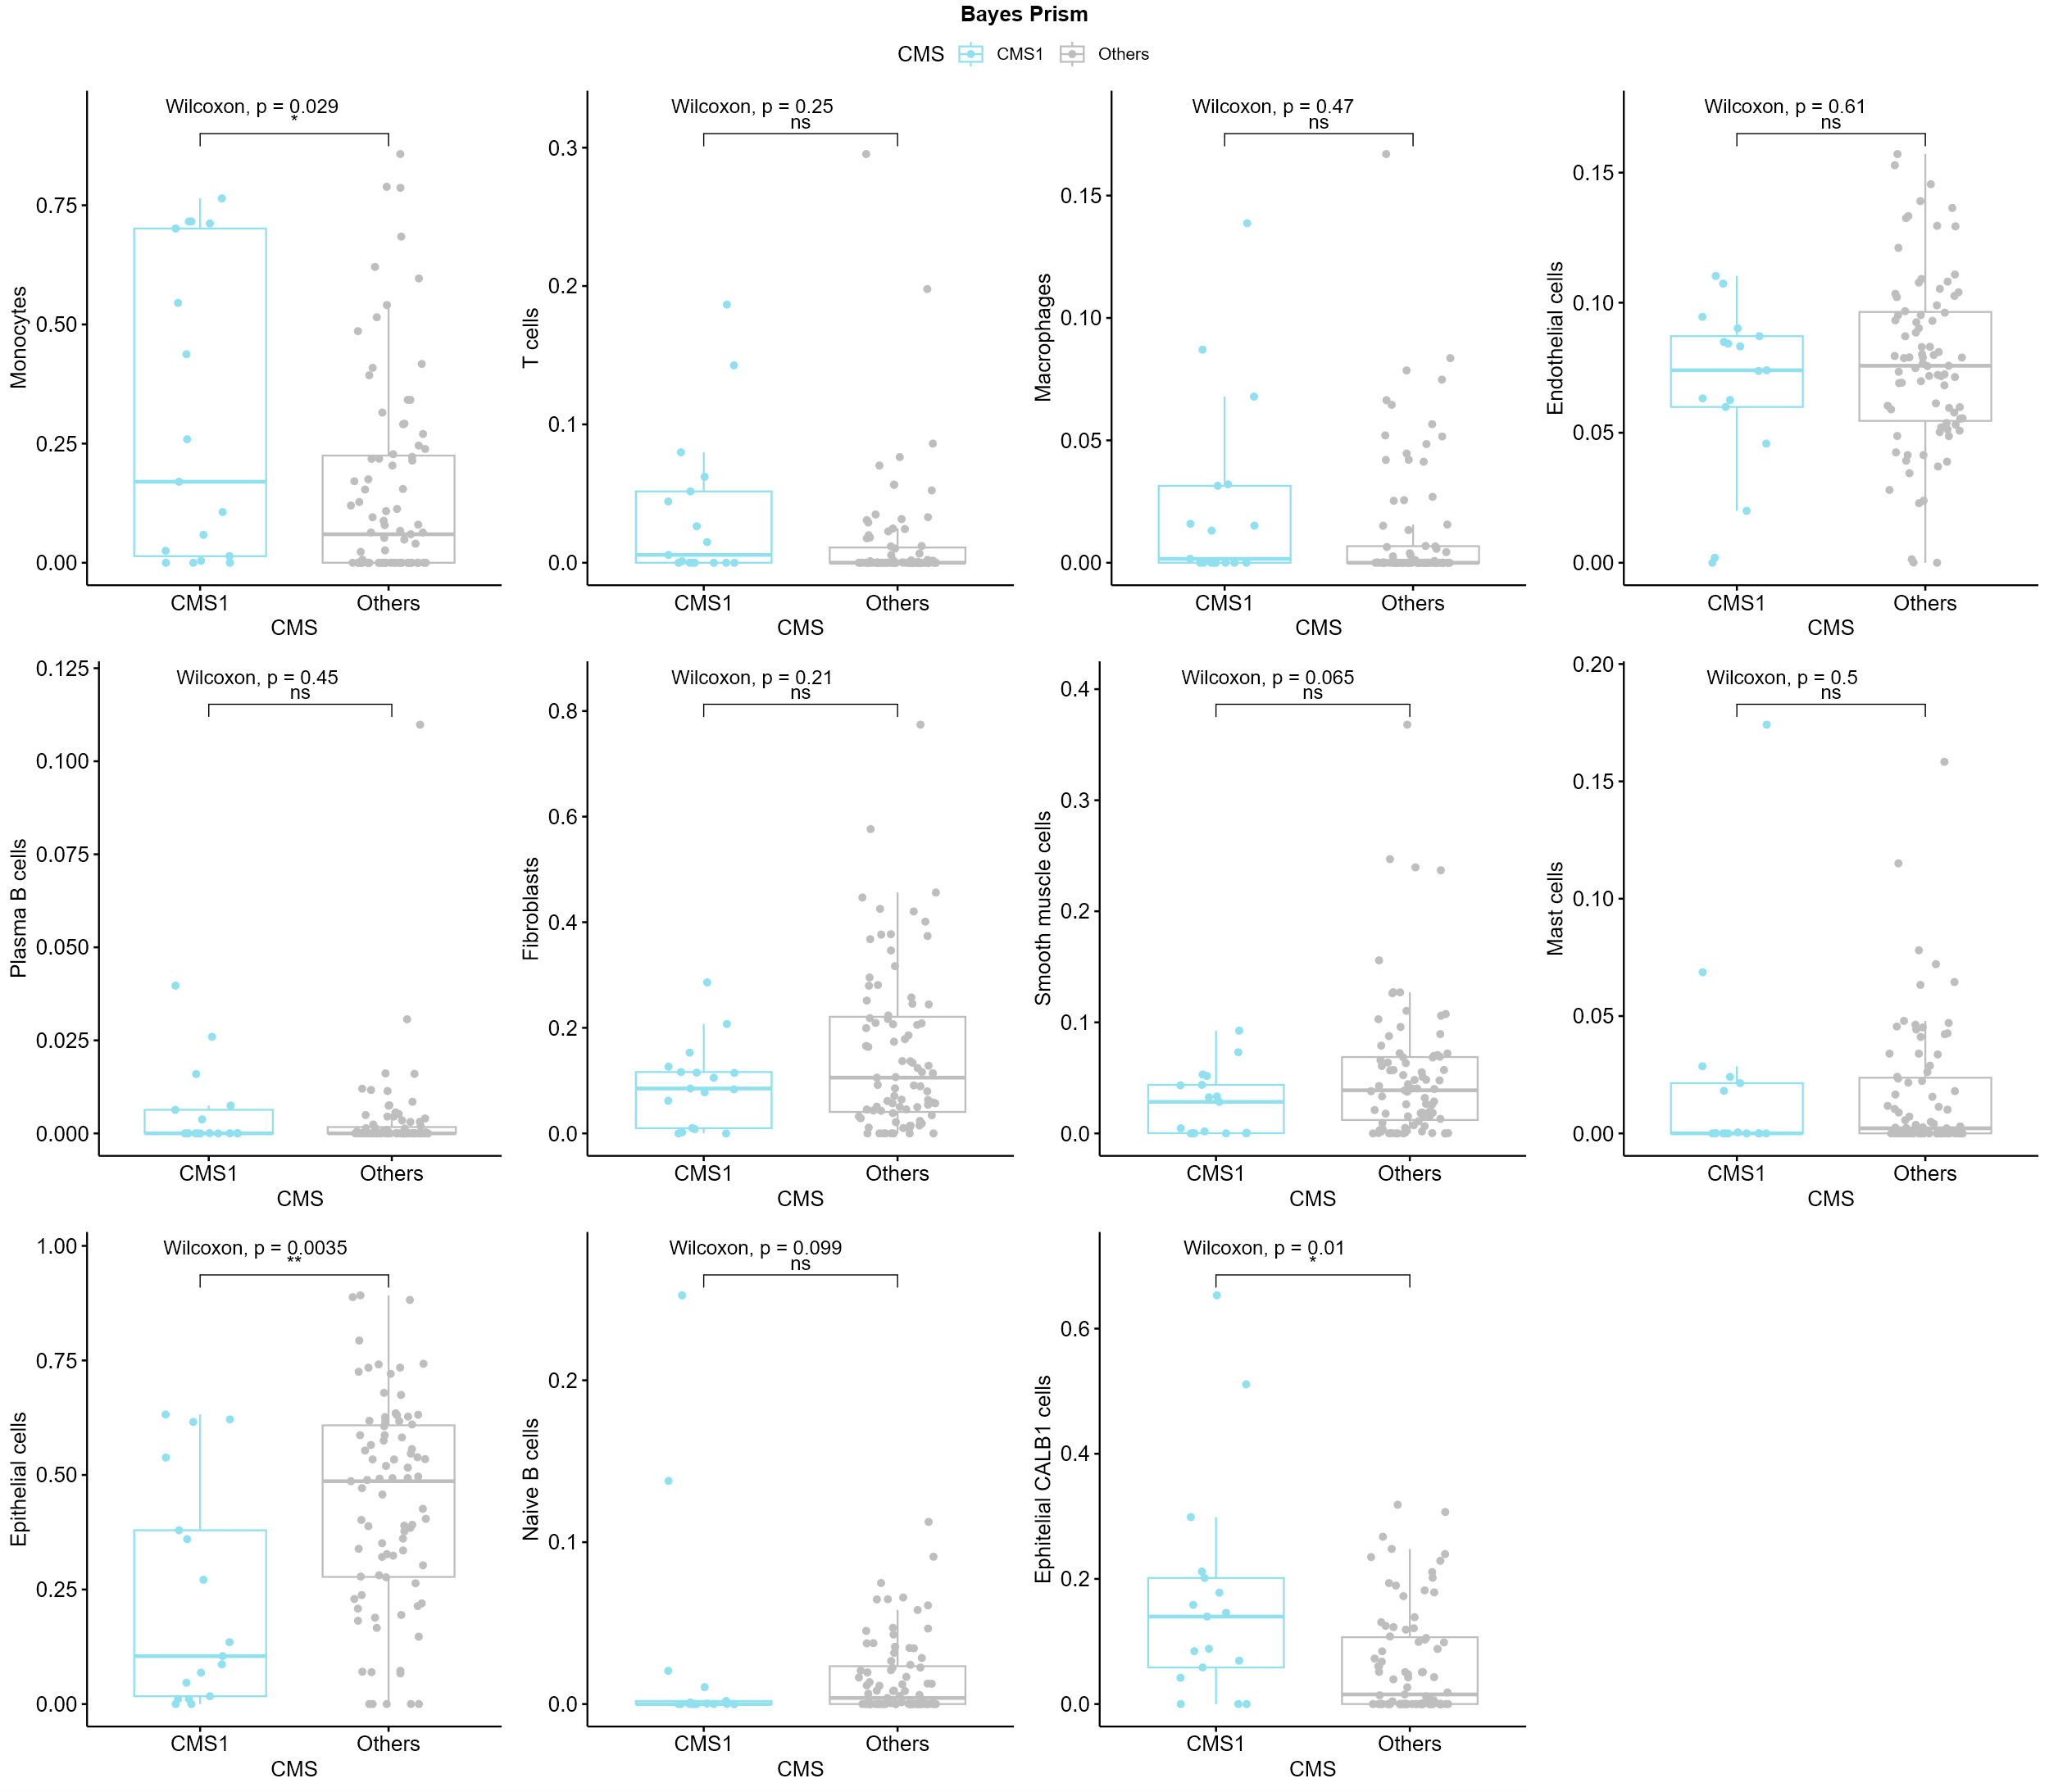
*

Supplementary 9 Bayes Prism statistical comparison of cell type proportions in CMS1 versus others;


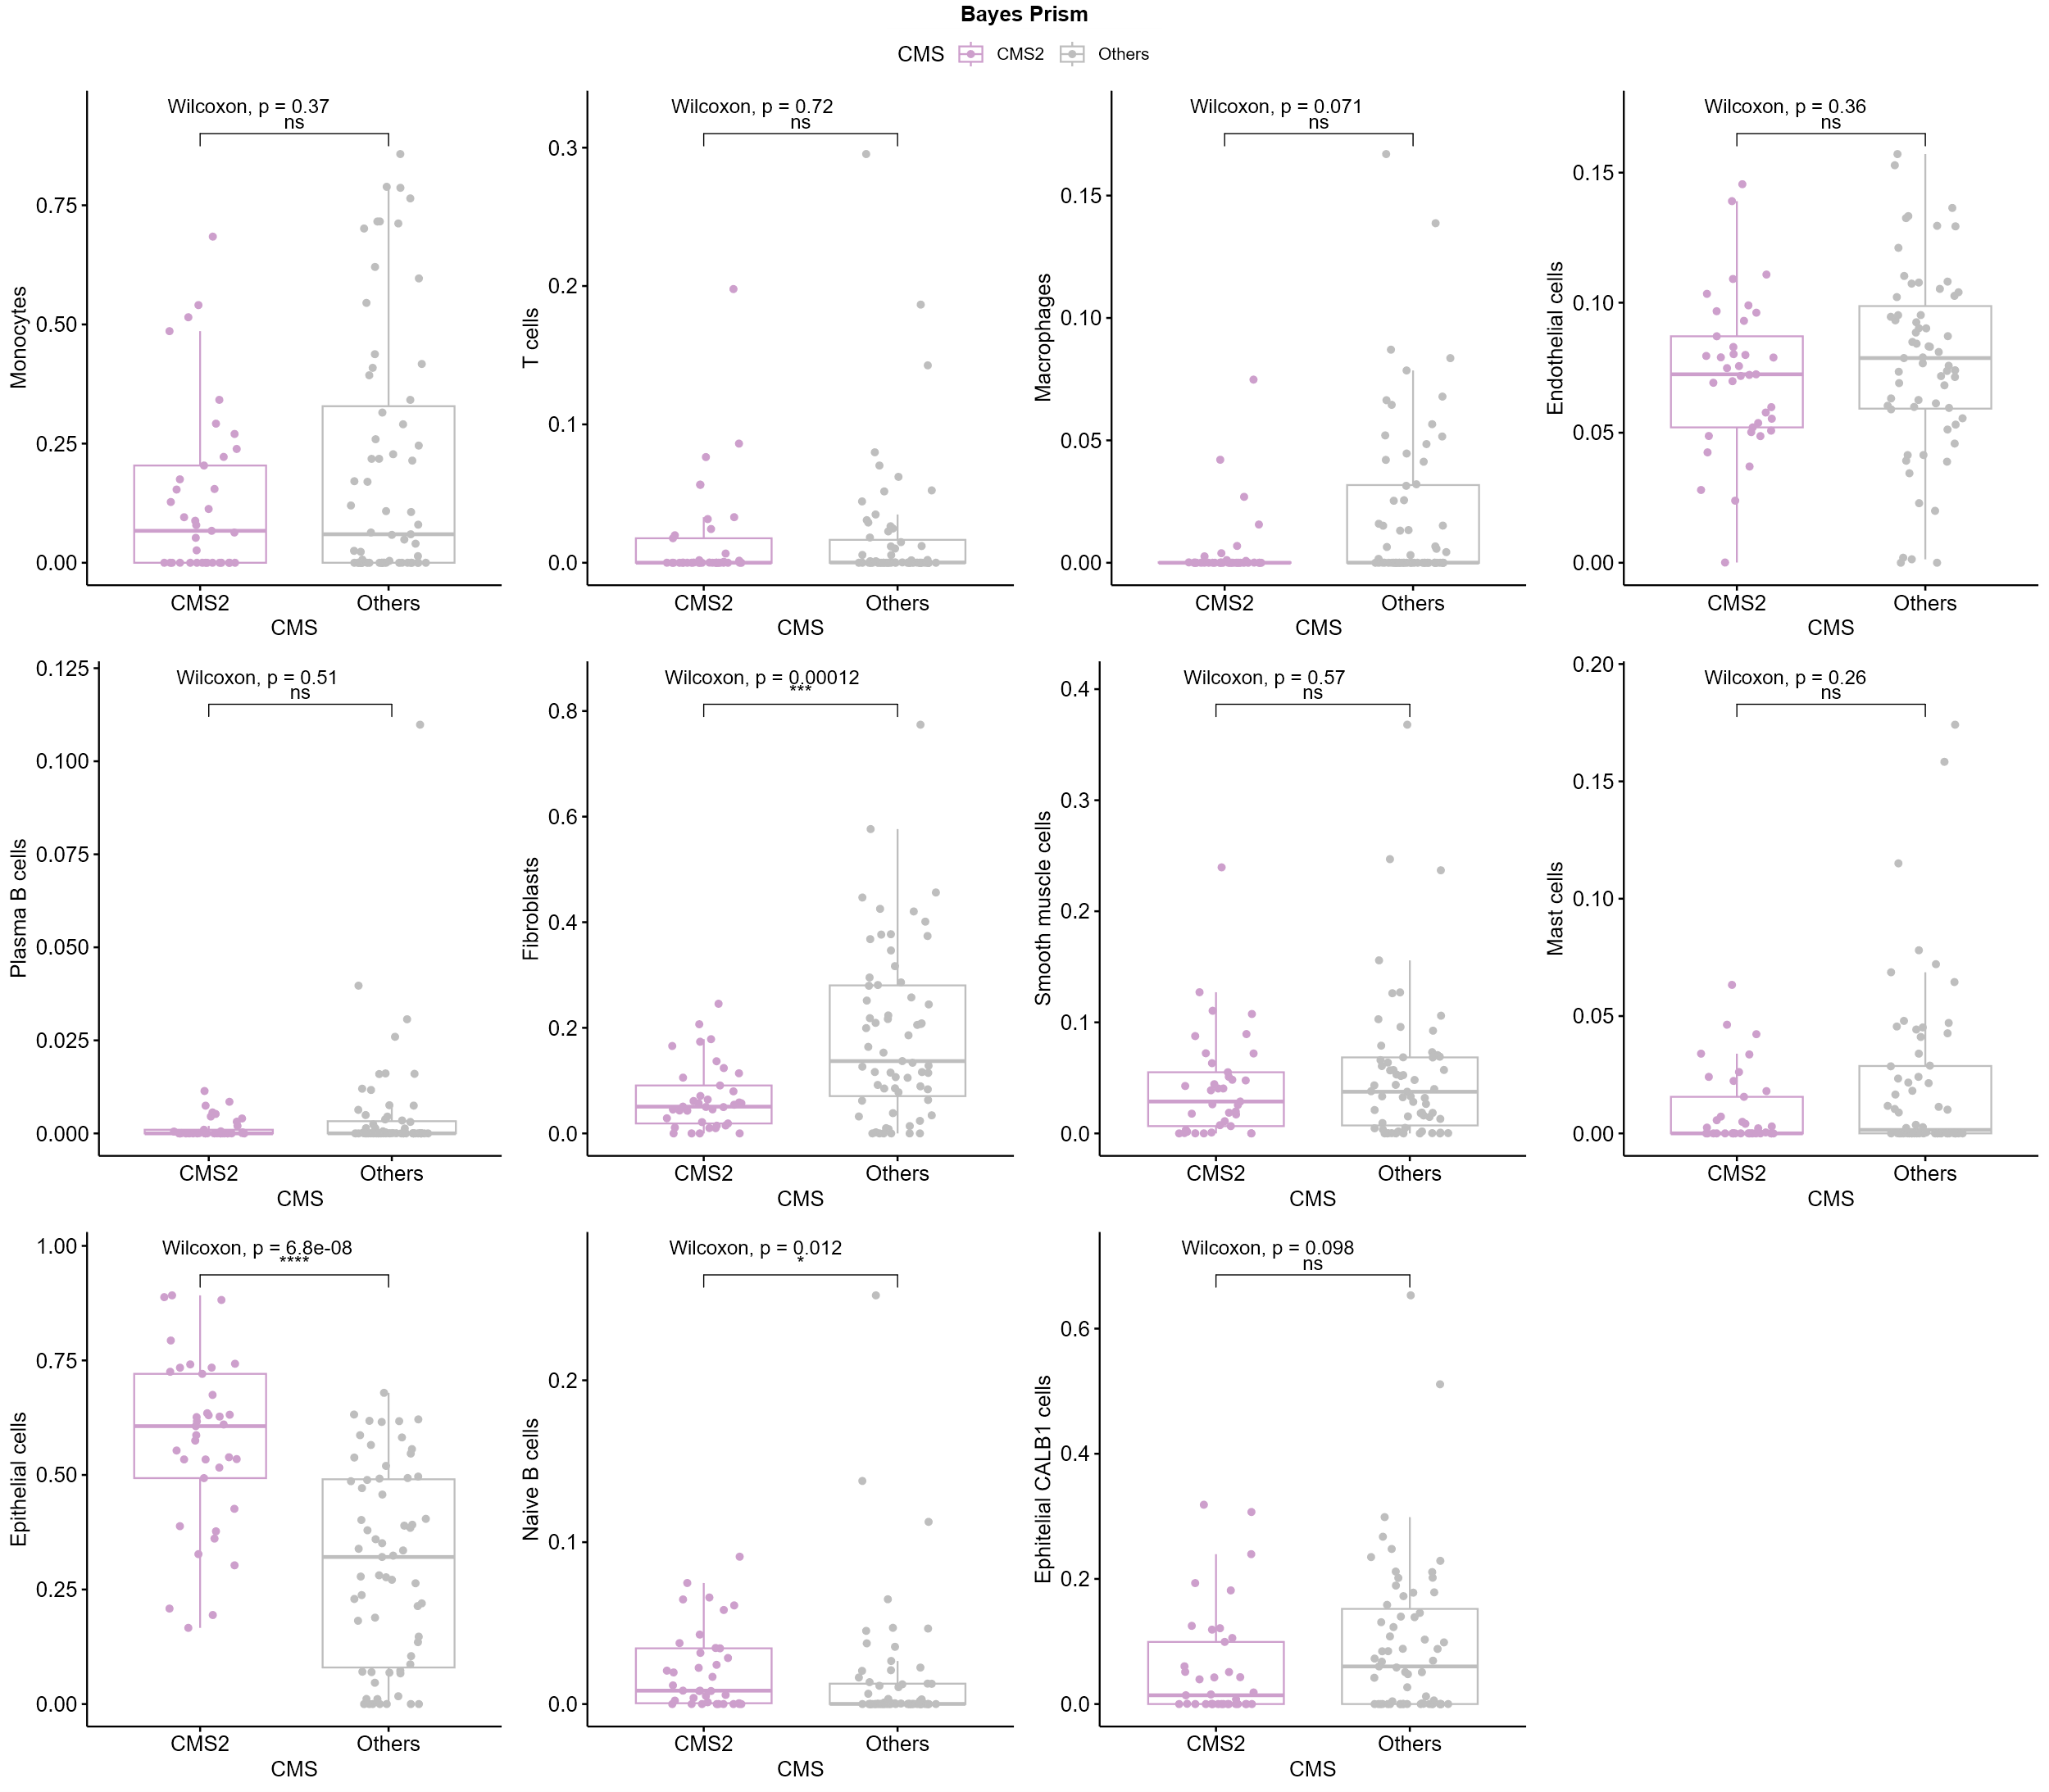


Supplementary 10 Bayes Prism statistical comparison of cell type proportions in CMS2 versus others;


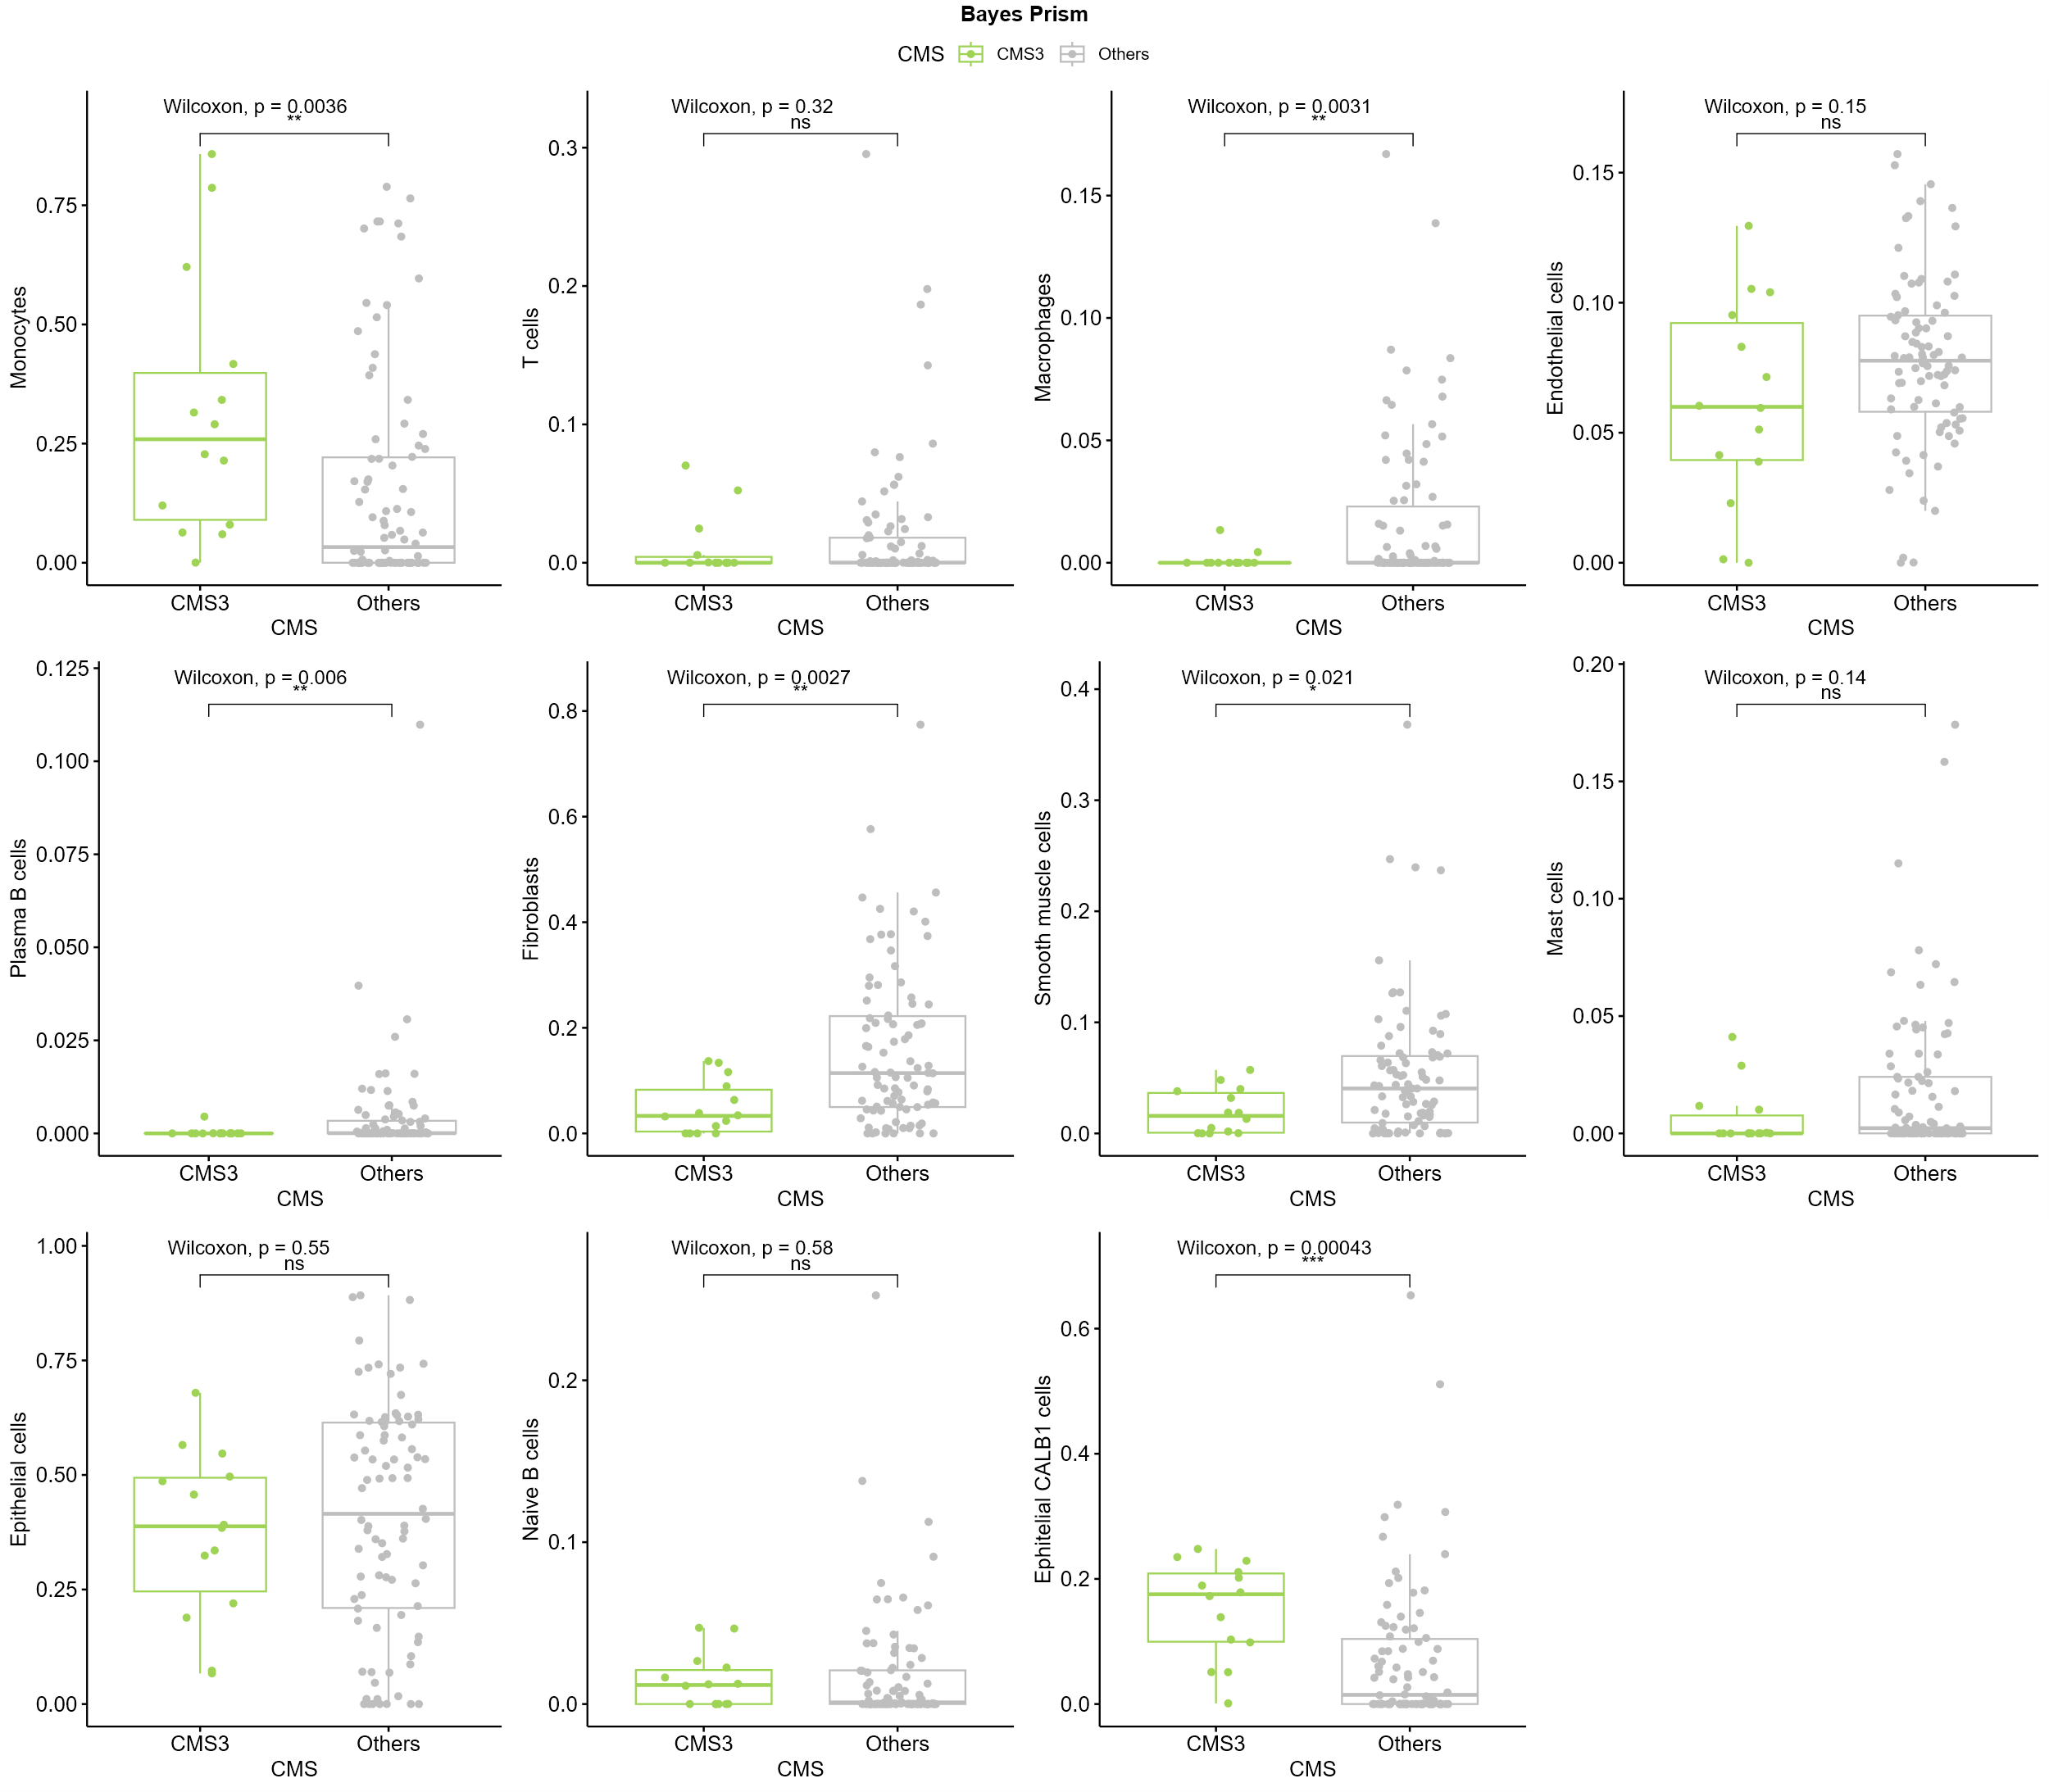


Supplementary 11 Bayes Prism statistical comparison of cell type proportions in CMS3 versus others;


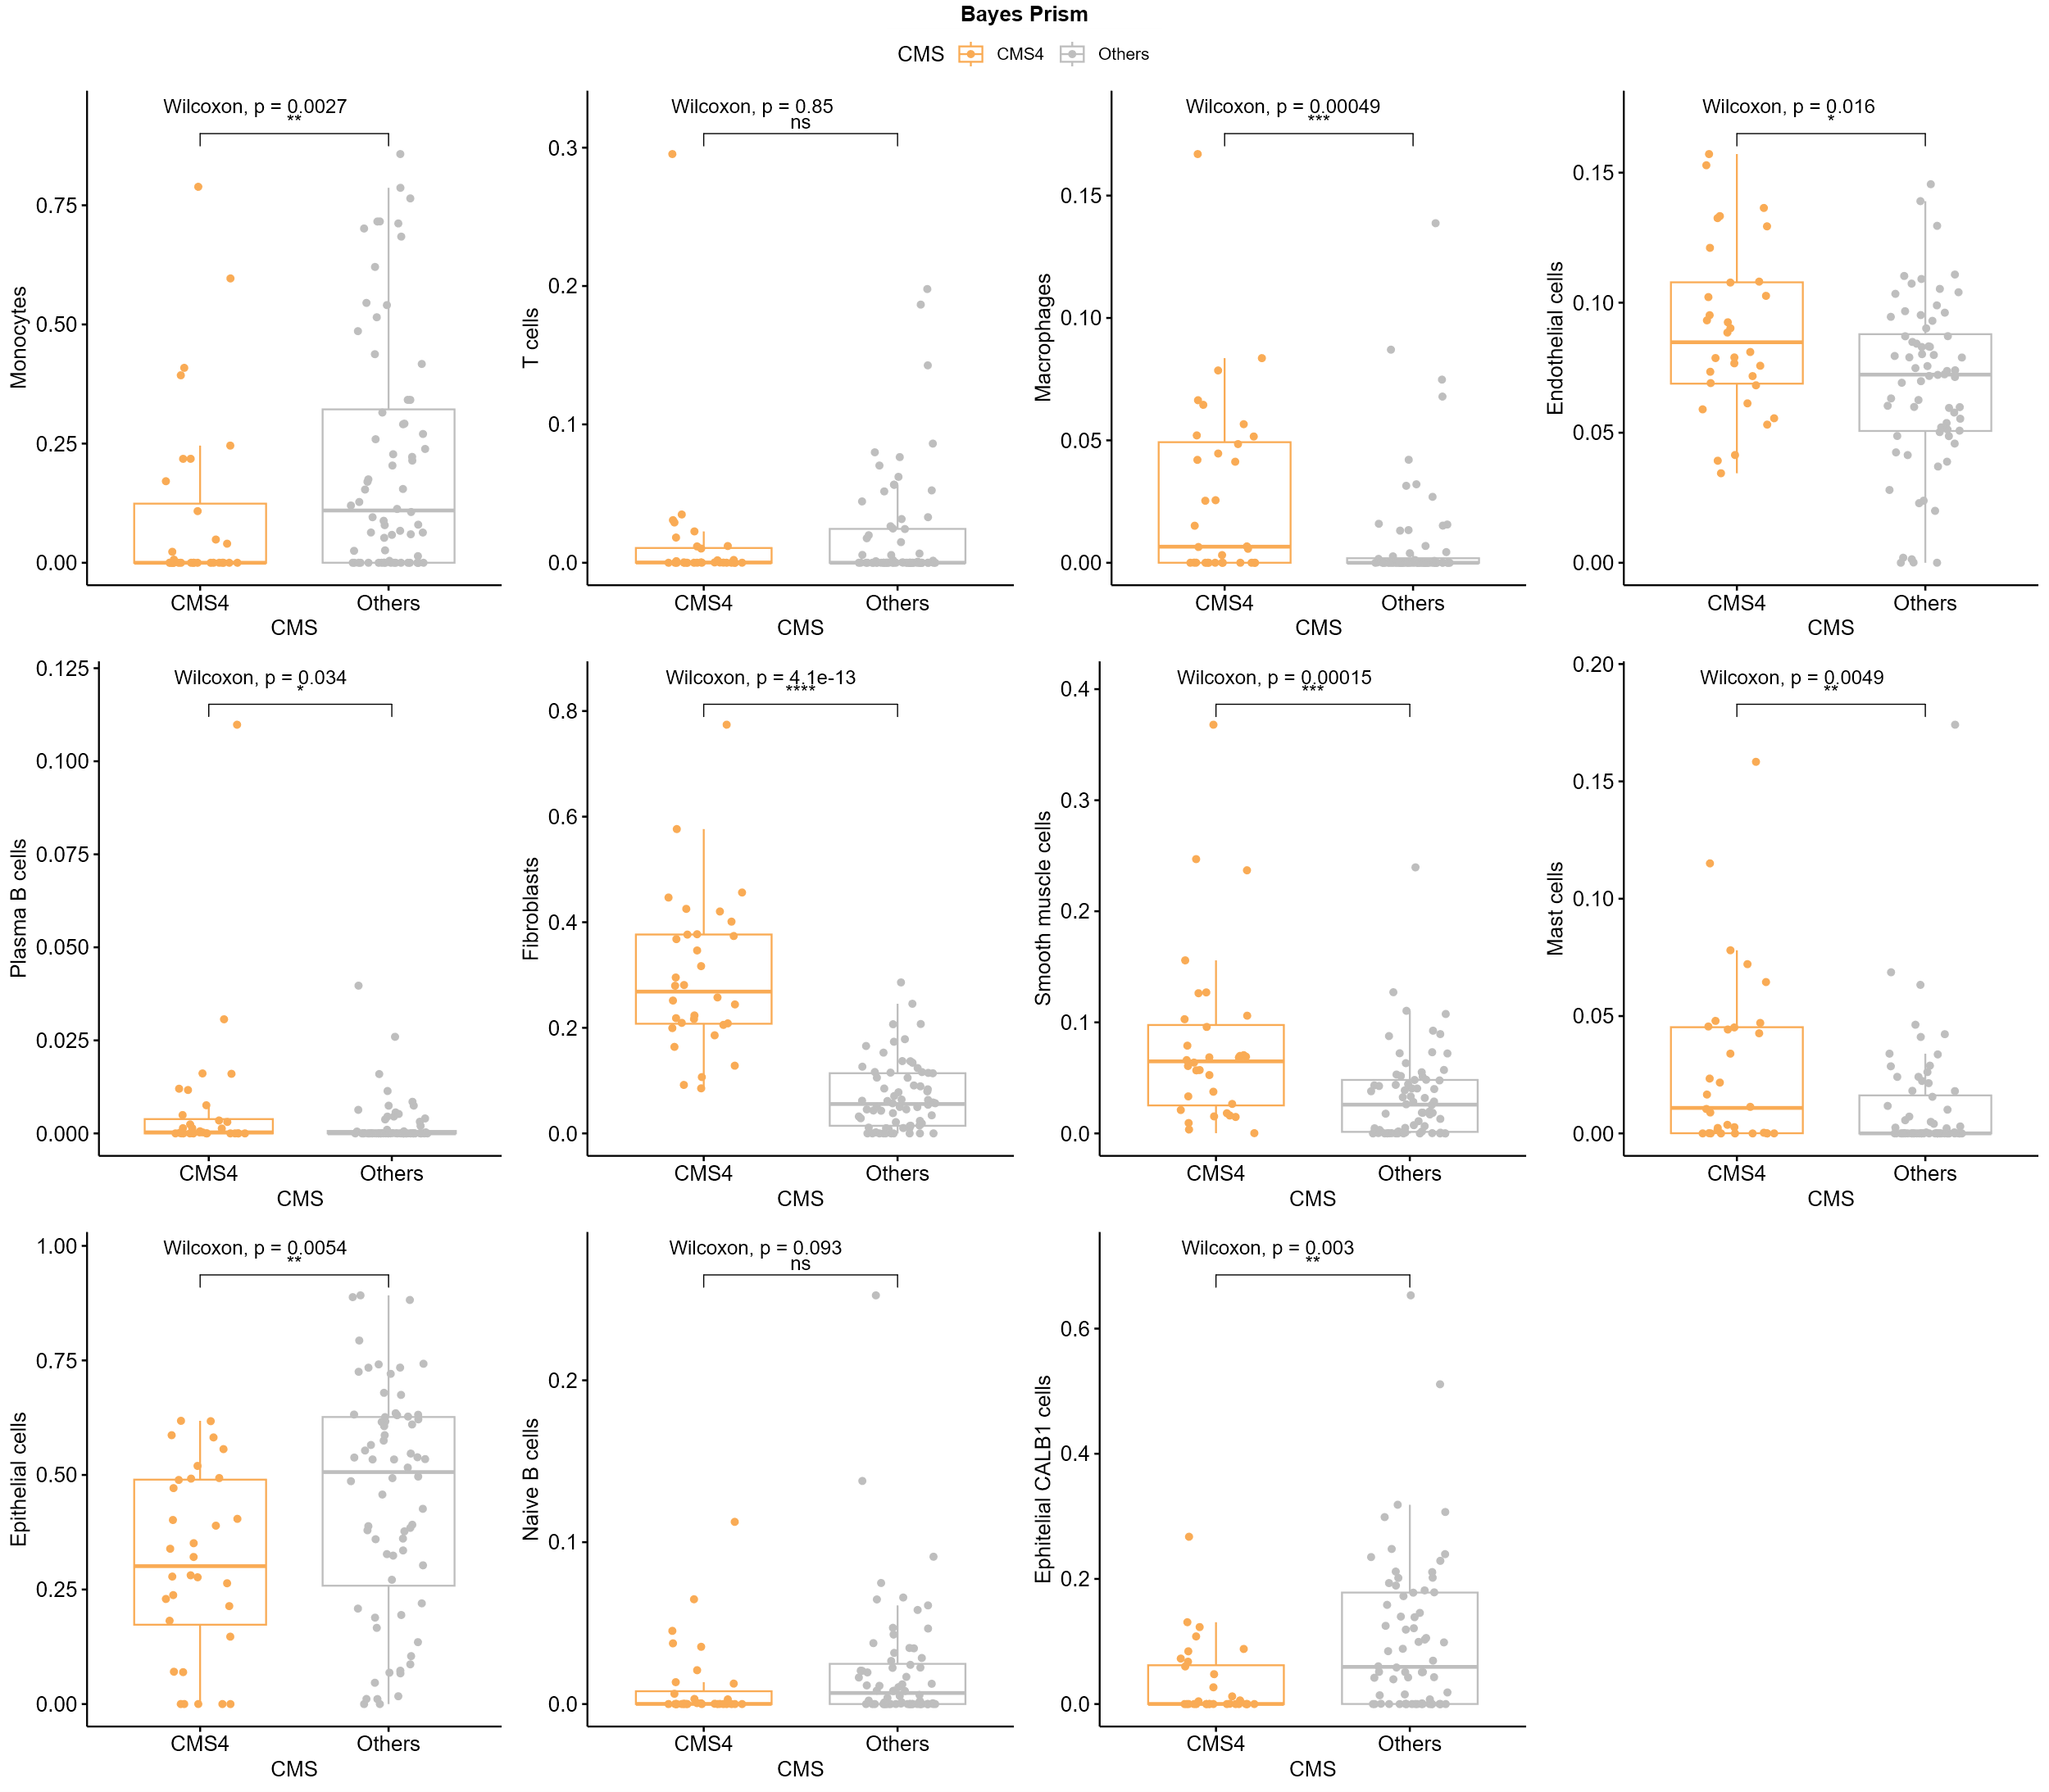


Supplementary 12 Bayes Prism statistical comparison of cell type proportions in CMS4 versus others;

Editing Global Statistic


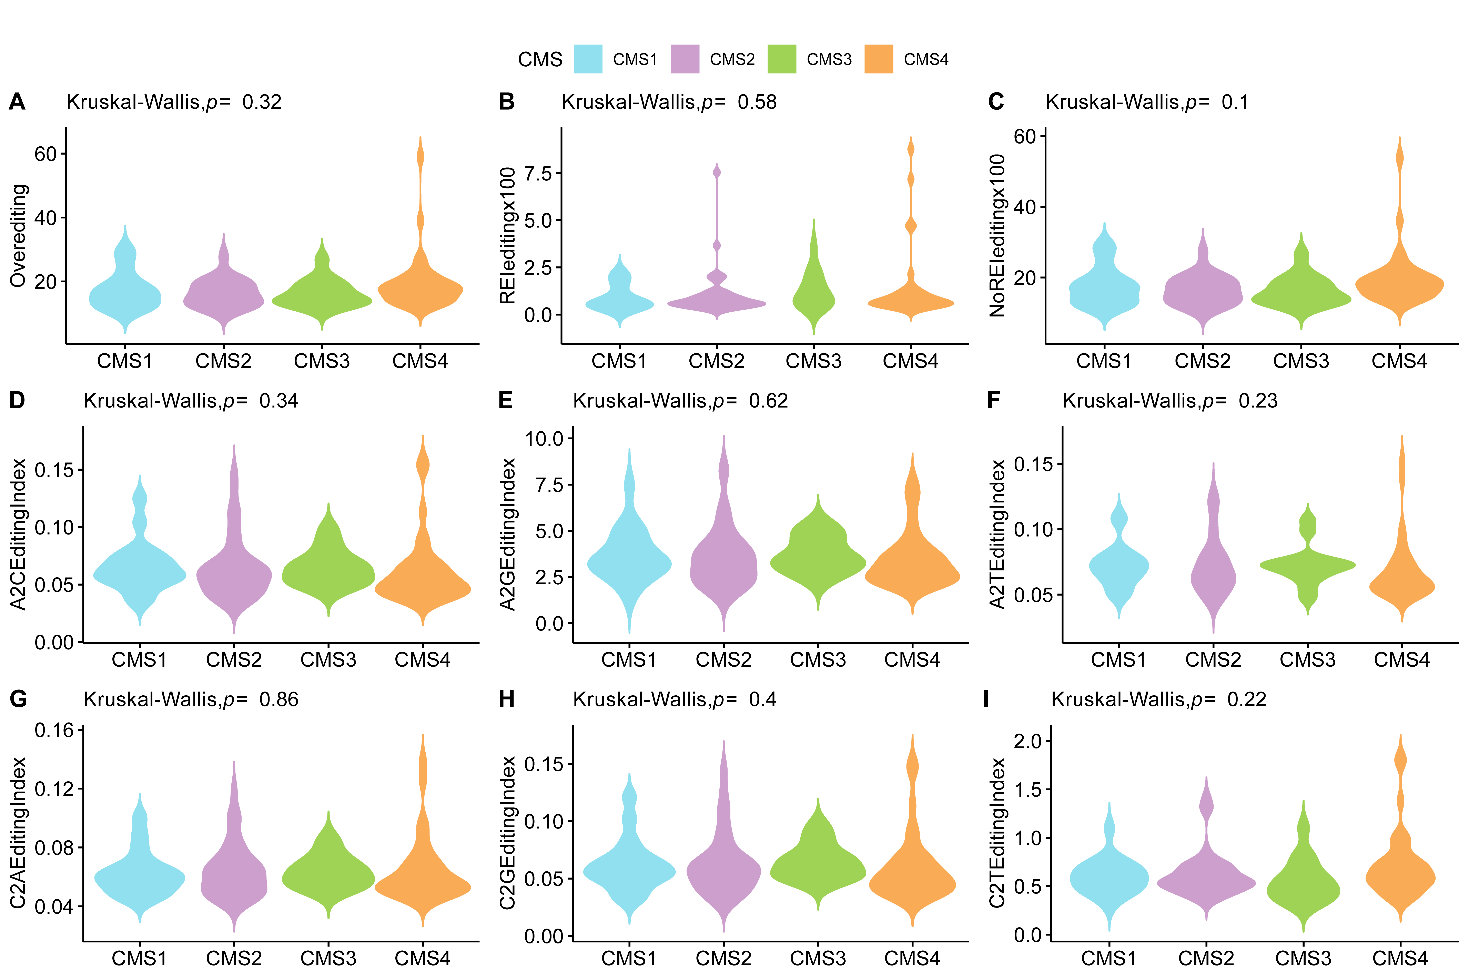


Supplementary 13 Violin plot showing the results of RNA editing statistics between CMS subtype, The statistical test applied was Kruskal-Wallis, followed by Dunn's post-hoc test. Asterisks indicate statistical significance: ns = not significant, p ≤ 0.05 (), p ≤ 0.01 (), p ≤ 0.001 (), p ≤ 0.0001 (****). A Results from GetOverall, B results from GetREI, C results from GetNoREI, D to I results from the RNAEditingIndex tool.

CeRNA networks


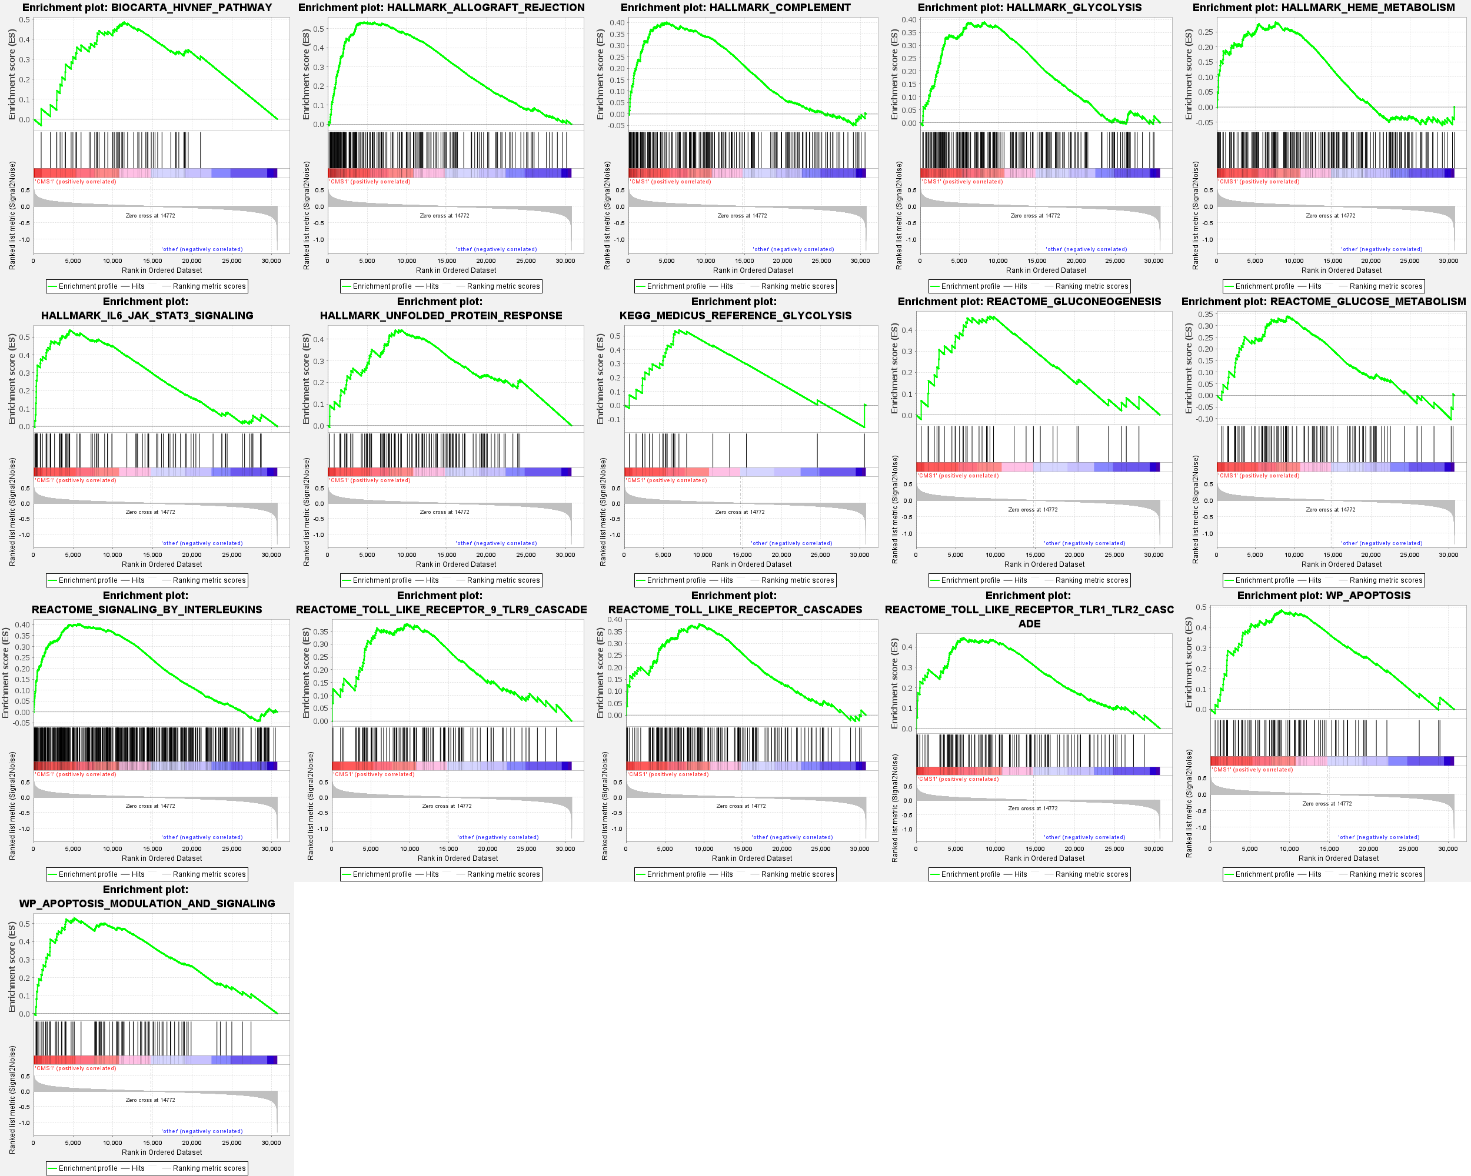


Supplementary 14 GSEA enrichment results used to construct the CMS1 network

# Edited lncRNA in CMS1 Subtype

| Position | Editing | lncRNA | Dunn_P_Value | Z_score | Result |
| --- | --- | --- | --- | --- | --- |
| chr1:174013645 | T_C | RC3H1-IT1 | 0.0001 | -3.9171 | CMS3 > CMS1 |
| chr1:174013646 | T_C | RC3H1-IT1 | 0.00004 | -4.1538 | CMS3 > CMS1 |

Supplementary Table 1 The Long Non coding edited in CMS1 network


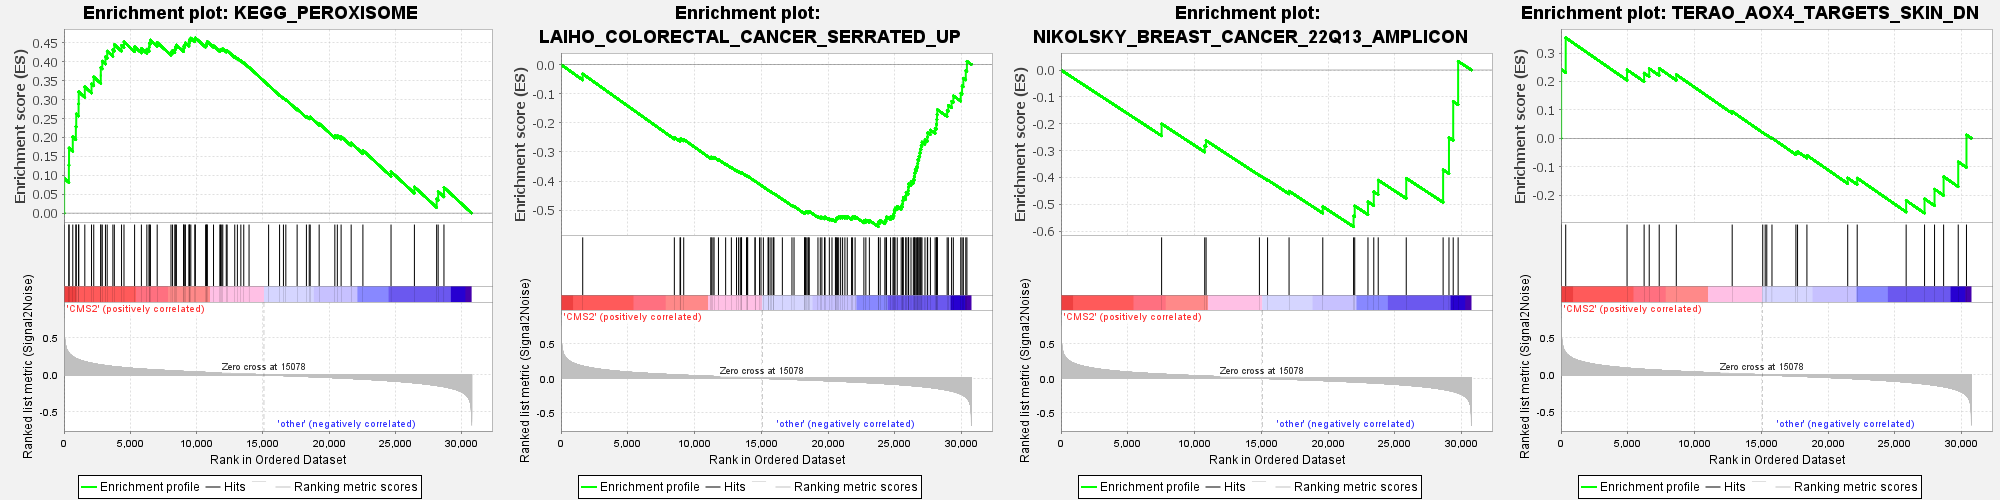


Supplementary 15 GSEA enrichment results used to construct the CMS2 network

# Edited lncRNA in CMS2 Subtype

| Position | Editing | lncRNA | Dunn_P_Value | Z_score | Result |
| --- | --- | --- | --- | --- | --- |
| chr13:110899024 | T_C | ANKRD10-IT1 | 0.00155 | -3.4773 | CMS4 > CMS2 |
| chr2:186119862 | T_C | LINC01473 | 0.0082 | 2.9925 | CMS2 > CMS4 |
| chr2:186135339 | T_C | LINC01473 | 0.0086 | 2.7626 | CMS2 > CMS4 |
| chr2:186135345 | T_C | LINC01473 | 0.0007 | 3.4658 | CMS2 > CMS4 |
| chr2:186135439 | T_C | LINC01473 | 0.0017 | 3.4415 | CMS2 > CMS4 |
| chr2:186135447 | T_C | LINC01473 | 0.0020 | 3.3975 | CMS2 > CMS4 |
| chr2:186181060 | T_C | LINC01473 | 0.0040 | 3.20411 | CMS2 > CMS4 |
| chr2:186301889 | T_C | LINC01473 | 0.0096 | 2.94520 | CMS2 > CMS4 |

Supplementary Table 2 The Long Non coding edited in CMS2 network.

# Edited lncRNA in CMS3 Subtype

| Position | Editing | lncRNA | Dunn_P_Value | Z_score | Result |
| --- | --- | --- | --- | --- | --- |
| chr1:174012594 | T_C | RC3H1-IT1 | 0.0069 | 3.0479 | CMS3 > CMS4 |
| chr1:174013645 | T_C | RC3H1-IT1 | 0.00002 | 4.4942 | CMS3 > CMS4 |
| chr1:174013646 | T_C | RC3H1-IT1 | 0.00004 | 4.3342 | CMS3 > CMS4 |
| chr1:174015480 | T_C | RC3H1-IT1 | 0.0029 | 3.2966 | CMS3 > CMS4 |
| chr1:174016141 | T_C | RC3H1-IT1 | 0.0072 | 3.0354 | CMS3 > CMS4 |
| chr1:174013645 | T_C | RC3H1-IT1 | 0.0001 | -3.9171 | CMS3 > CMS1 |
| chr1:174013645 | T_C | RC3H1-IT1 | 0.0009 | -3.2965 | CMS3 > CMS2 |
| chr1:174013646 | T_C | RC3H1-IT1 | 0.00004 | -4.1538 | CMS3 > CMS1 |
| chr1:174013646 | T_C | RC3H1-IT1 | 0.0010 | -3.2736 | CMS3 > CMS2 |
| chr12:123577817 | T_C | TMED2-DT | 0.0043 | 3.1817 | CMS3 > CMS4 |
| chr16:89713061 | A_G | VPS9D1-AS1 | 0.0007 | 3.6460 | CMS3 > CMS4 |
| chr16:89713062 | A_G | VPS9D1-AS1 | 0.0055 | 3.1123 | CMS3 > CMS4 |
| chr16:89713421 | A_G | VPS9D1-AS1 | 0.0068 | 3.0516 | CMS3 > CMS4 |
| chr16:89715860 | A_G | VPS9D1-AS1 | 0.0074 | 2.8081 | CMS3 > CMS4 |
| chr17:77089870 | A_G | SNHG20 | 0.0014 | 3.4893 | CMS3 > CMS4 |
| chr17:77090153 | A_G | SNHG20 | 0.0078 | 3.0110 | CMS3 > CMS4 |
| chr17:77091181 | A_G | SNHG20 | 0.0059 | 3.0930 | CMS3 > CMS4 |
| chr17:77091308 | A_G | SNHG20 | 0.0024 | 3.3424 | CMS3 > CMS4 |
| chr17:77091995 | A_G | SNHG20 | 0.0005 | 3.7491 | CMS3 > CMS4 |
| chr17:82477703 | A_G | NARF-AS1 | 0.0097 | 2.9444 | CMS3 > CMS4 |
| chr19:54445376 | T_C | LENG8-AS1 | 0.0001 | 3.8672 | CMS3 > CMS4 |
| chr19:54447902 | T_C | LENG8-AS1 | 0.0069 | 3.0477 | CMS3 > CMS4 |
| chr22:25109927 | A_G | KIAA1671-AS1 | 0.0024 | 3.3445 | CMS3 > CMS4 |
| chr3:47167574 | A_G | KIF9-AS1 | 0.0063 | 3.0720 | CMS3 > CMS4 |
| chr3:47167622 | A_G | KIF9-AS1 | 0.0013 | 3.5176 | CMS3 > CMS4 |
| chr3:47168658 | A_G | KIF9-AS1 | 0.0086 | 2.9806 | CMS3 > CMS4 |
| chr3:47175319 | A_G | KIF9-AS1 | 0.0053 | 3.1226 | CMS3 > CMS4 |
| chr3:47179568 | A_G | KIF9-AS1 | 0.0024 | 3.3456 | CMS3 > CMS4 |
| chr3:47182562 | A_G | KIF9-AS1 | 0.0066 | 3.0579 | CMS3 > CMS4 |
| chr3:47182591 | A_G | KIF9-AS1 | 0.0036 | 3.2349 | CMS3 > CMS4 |
| chr3:47192210 | A_G | KIF9-AS1 | 0.0006 | 3.6968 | CMS3 > CMS4 |
| chr3:47218144 | A_G | KIF9-AS1 | 0.0001 | 4.0689 | CMS3 > CMS4 |
| chr3:47232485 | A_G | KIF9-AS1 | 0.0019 | 3.4046 | CMS3 > CMS4 |
| chr3:47167574 | A_G | KIF9-AS1 | 0.0088 | -2.7520 | CMS3 > CMS2 |
| chr3:47167622 | A_G | KIF9-AS1 | 0.0052 | -2.9210 | CMS3 > CMS2 |
| chr3:47218144 | A_G | KIF9-AS1 | 0.0003 | -3.6126 | CMS3 > CMS1 |
| chr3:47218144 | A_G | KIF9-AS1 | 0.0002 | -3.762208 | CMS3 > CMS2 |
| chr3:47232485 | A_G | KIF9-AS1 | 0.0080 | -2.785544 | CMS3 > CMS2 |
| chr4:2960151 | T_C | NOP14-AS1 | 0.0037 | 3.228266 | CMS3 > CMS4 |
| chr4:2960236 | T_C | NOP14-AS1 | 0.0034 | 2.9247 | CMS3 > CMS4 |
| chr9:137617194 | A_G | ARRDC1-AS1 | 0.0076 | 3.0175 | CMS3 > CMS4 |

Supplementary Table 3 The Long Non coding edited in CMS3 network

# Edited lncRNA in CMS4 Subtype

| Position | Editing | lncRNA | Dunn_P_Value | Z_score | result |
| --- | --- | --- | --- | --- | --- |
| chr13:110899024 | T_C | ANKRD10-IT1 | 0.0015 | -3.4773 | CMS4 > CMS2 |
| chr2:186119862 | T_C | LINC01473 | 0.0082 | 2.9925 | CMS2 > CMS4 |
| chr2:186119862 | T_C | LINC01473 | 0.00581 | 2.8855 | CMS3 > CMS4 |
| chr2:186135339 | T_C | LINC01473 | 0.0086 | 2.7626 | CMS2 > CMS4 |
| chr2:186135345 | T_C | LINC01473 | 0.00071 | 3.4658 | CMS2 > CMS4 |
| chr2:186135345 | T_C | LINC01473 | 0.0002 | 3.9439 | CMS3 > CMS4 |
| chr2:186135439 | T_C | LINC01473 | 0.0017 | 3.4415 | CMS2 > CMS4 |
| chr2:186135447 | T_C | LINC01473 | 0.0020 | 3.3975 | CMS2 > CMS4 |
| chr2:186181060 | T_C | LINC01473 | 0.0040 | 3.2041 | CMS2 > CMS4 |
| chr2:186241729 | T_C | LINC01473 | 0.0011 | 3.5504 | CMS3 > CMS4 |
| chr2:186301889 | T_C | LINC01473 | 0.0096 | 2.9452 | CMS2 > CMS4 |
| chr2:217685146 | T_C | DIRC3 | 0.0014 | 3.4828 | CMS3 > CMS4 |
| chr2:217685197 | T_C | DIRC3 | 0.0025 | 3.3377 | CMS3 > CMS4 |
| chr5:149418603 | A_G | CARMN | 0.0043 | -3.1874 | CMS4 > CMS3 |
| chr5:149426766 | A_G | CARMN | 0.0076 | 3.0176 | CMS3 > CMS4 |
| chr5:149427913 | A_G | CARMN | 0.0046 | 3.1653 | CMS3 > CMS4 |
| chr7:117120557 | A_G | ST7-AS2 | 0.0095 | 2.9488 | CMS3 > CMS4 |
| chr7:117120676 | A_G | ST7-AS2 | 0.0087 | 2.9756 | CMS3 > CMS4 |
| chr7:117120705 | A_G | ST7-AS2 | 0.0098 | 2.9406 | CMS3 > CMS4 |
| chr7:117122131 | A_G | ST7-AS2 | 0.0015 | 3.4741 | CMS3 > CMS4 |

Supplementary Table 4 The Long Non coding edited in CMS4 network

Survival Analysis

| **Characteristic** | **N** | **HR** | **95% CI** | **p-value** |
| --- | --- | --- | --- | --- |
| Sex | 100 |  |  |  |
| F |  | — | — |  |
| M |  | 1.33 | 0.74, 2.41 | 0.34 |
| Age | 100 | 0.99 | 0.97, 1.02 | 0.49 |
| Sideness | 100 |  |  |  |
| left |  | — | — |  |
| right |  | 1.05 | 0.58, 1.90 | 0.86 |
| Stage | 100 |  |  |  |
| I |  | — | — |  |
| II |  | 1.40 | 0.16, 12.6 | 0.76 |
| III |  | 4.28 | 0.57, 32.1 | 0.16 |
| IV |  | 7.54 | 1.01, 56.1 | 0.049 |
| CMS | 100 |  |  |  |
| CMS1 |  | — | — |  |
| CMS2 |  | 0.84 | 0.30, 2.33 | 0.74 |
| CMS3 |  | 0.91 | 0.26, 3.24 | 0.89 |
| CMS4 |  | 3.25 | 1.33, 7.95 | 0.010 |
| iCMS | 100 |  |  |  |
| iCMS2 |  | — | — |  |
| iCMS3 |  | 1.64 | 0.89, 3.00 | 0.11 |
| MSI | 100 |  |  |  |
| MSI-H |  | — | — |  |
| MSS |  | 1.58 | 0.56, 4.41 | 0.39 |
| KRAS | 100 |  |  |  |
| mut |  | — | — |  |
| wt |  | 0.86 | 0.48, 1.56 | 0.62 |
| BRAF | 100 |  |  |  |
| mut |  | — | — |  |
| wt |  | 1.45 | 0.52, 4.05 | 0.48 |
| PIK3CA | 100 |  |  |  |
| mut |  | — | — |  |
| wt |  | 0.91 | 0.47, 1.78 | 0.79 |
| Overediting | 100 | 1.01 | 0.98, 1.05 | 0.52 |
| REIeditingx100 | 100 | 0.83 | 0.63, 1.10 | 0.19 |
| NoREIeditingx100 | 100 | 1.02 | 0.98, 1.05 | 0.39 |
| ADAR | 100 | 2.46 | 1.21, 5.00 | 0.013 |
| ADARB1 | 100 | 3.69 | 2.12, 6.42 | <0.001 |
| ADARB2 | 100 | 0.81 | 0.64, 1.04 | 0.10 |
| APOBEC2 | 100 | 0.90 | 0.60, 1.34 | 0.60 |
| APOBEC3A | 100 | 0.87 | 0.61, 1.23 | 0.43 |
| chr1_160332454_TC_COPA | 100 | 7.01 | 1.46, 33.8 | 0.015 |
| chr19_57813360_TC_ZNF552 | 100 | 0.04 | 0.00, 0.82 | 0.037 |
| chr3_62438132_TC_CADPS | 100 | 2.06 | 0.56, 7.53 | 0.27 |
| chr4_57110068_TC_IGFBP7 | 100 | 8.36 | 1.17, 60.0 | 0.035 |
| chr9_127183878_AG_RALGPS1 | 100 | 0.41 | 0.03, 5.86 | 0.51 |
| chr9_127183894_AG_RALGPS1 | 100 | 0.32 | 0.02, 5.06 | 0.42 |
| chr12_123577817_TC_TMED2_DT | 100 | 0.00 | 0.00, Inf | >0.99 |
| chr13_110899024_TC_ANKRD10_IT1 | 100 | 13.0 | 2.36, 71.4 | 0.003 |
| chr16_89713061_AG_VPS9D1_AS1 | 100 | 0.85 | 0.16, 4.60 | 0.85 |
| chr16_89713062_AG_VPS9D1_AS1 | 100 | 0.64 | 0.13, 3.13 | 0.58 |
| chr16_89713421_AG_VPS9D1_AS1 | 100 | 0.00 | 0.00, Inf | >0.99 |
| chr16_89715860_AG_VPS9D1_AS1 | 100 | 0.18 | 0.04, 0.88 | 0.034 |
| chr17_77089870_AG_SNHG20 | 100 | 0.03 | 0.00, 0.32 | 0.004 |
| chr17_77090153_AG_SNHG20 | 100 | 0.28 | 0.09, 0.92 | 0.035 |
| chr17_77091181_AG_SNHG20 | 100 | 0.31 | 0.08, 1.25 | 0.10 |
| chr17_77091308_AG_SNHG20 | 100 | 0.05 | 0.01, 0.35 | 0.002 |
| chr17_77091995_AG_SNHG20 | 100 | 0.31 | 0.07, 1.40 | 0.13 |
| chr17_82477703_AG_NARF_AS1 | 100 | 0.03 | 0.00, 4.47 | 0.17 |
| chr19_54445376_TC_LENG8_AS1 | 100 | 0.30 | 0.09, 0.99 | 0.048 |
| chr19_54447902_TC_LENG8_AS1 | 100 | 0.34 | 0.04, 3.39 | 0.36 |
| chr1_174012594_TC_RC3H1_IT1 | 100 | 0.13 | 0.02, 0.74 | 0.022 |
| chr1_174013645_TC_RC3H1_IT1 | 100 | 0.19 | 0.05, 0.72 | 0.014 |
| chr1_174013646_TC_RC3H1_IT1 | 100 | 0.23 | 0.06, 0.92 | 0.038 |
| chr1_174015480_TC_RC3H1_IT1 | 100 | 0.05 | 0.00, 0.64 | 0.020 |
| chr1_174016141_TC_RC3H1_IT1 | 100 | 0.06 | 0.01, 0.41 | 0.004 |
| chr22_25109927_AG_KIAA1671_AS1 | 100 | 0.39 | 0.11, 1.36 | 0.14 |
| chr2_186119862_TC_LINC01473 | 100 | 0.18 | 0.03, 0.94 | 0.042 |
| chr2_186135339_TC_LINC01473 | 100 | 0.69 | 0.12, 3.93 | 0.68 |
| chr2_186135345_TC_LINC01473 | 100 | 0.37 | 0.15, 0.93 | 0.034 |
| chr2_186135439_TC_LINC01473 | 100 | 0.27 | 0.07, 1.08 | 0.065 |
| chr2_186135447_TC_LINC01473 | 100 | 0.31 | 0.07, 1.30 | 0.11 |
| chr2_186181060_TC_LINC01473 | 100 | 0.07 | 0.00, 2.56 | 0.14 |
| chr2_186241729_TC_LINC01473 | 100 | 0.56 | 0.04, 8.58 | 0.68 |
| chr2_186301889_TC_LINC01473 | 100 | 0.02 | 0.00, 1.18 | 0.060 |
| chr2_217685146_TC_DIRC3 | 100 | 0.00 | 0.00, Inf | >0.99 |
| chr2_217685197_TC_DIRC3 | 100 | 0.02 | 0.00, 0.84 | 0.040 |
| chr3_47167574_AG_KIF9_AS1 | 100 | 0.00 | 0.00, Inf | >0.99 |
| chr3_47167622_AG_KIF9_AS1 | 100 | 0.85 | 0.04, 17.8 | 0.91 |
| chr3_47168658_AG_KIF9_AS1 | 100 | 0.14 | 0.03, 0.67 | 0.014 |
| chr3_47175319_AG_KIF9_AS1 | 100 | 0.16 | 0.03, 0.80 | 0.025 |
| chr3_47179568_AG_KIF9_AS1 | 100 | 0.25 | 0.03, 2.47 | 0.24 |
| chr3_47182562_AG_KIF9_AS1 | 100 | 0.01 | 0.00, 0.87 | 0.043 |
| chr3_47182591_AG_KIF9_AS1 | 100 | 0.06 | 0.00, 1.44 | 0.083 |
| chr3_47192210_AG_KIF9_AS1 | 100 | 0.02 | 0.00, 1.01 | 0.050 |
| chr3_47218144_AG_KIF9_AS1 | 100 | 0.61 | 0.03, 12.9 | 0.75 |
| chr3_47232485_AG_KIF9_AS1 | 100 | 0.00 | 0.00, Inf | >0.99 |
| chr4_2960151_TC_NOP14_AS1 | 100 | 0.22 | 0.02, 2.15 | 0.19 |
| chr4_2960236_TC_NOP14_AS1 | 100 | 0.01 | 0.00, 0.22 | 0.006 |
| chr5_149418603_AG_CARMN | 100 | 1.80 | 0.37, 8.78 | 0.47 |
| chr5_149426766_AG_CARMN | 100 | 0.10 | 0.01, 1.18 | 0.068 |
| chr5_149427913_AG_CARMN | 100 | 0.03 | 0.00, 1.55 | 0.083 |
| chr7_117120557_AG_ST7_AS2 | 100 | 0.67 | 0.13, 3.39 | 0.63 |
| chr7_117120676_AG_ST7_AS2 | 100 | 0.31 | 0.09, 1.10 | 0.071 |
| chr7_117120705_AG_ST7_AS2 | 100 | 0.22 | 0.06, 0.75 | 0.016 |
| chr7_117122131_AG_ST7_AS2 | 100 | 0.00 | 0.00, Inf | >0.99 |
| chr9_137617194_AG_ARRDC1_AS1 | 100 | 0.04 | 0.00, 3.18 | 0.15 |
| Abbreviations: CI = Confidence Interval, HR = Hazard Ratio | | | | |

Supplementary Table 5 Univariate Cox analysis: hazard ratios (HR) with 95% confidence intervals for each variable.

*Feature Selection: Correlation methods:*
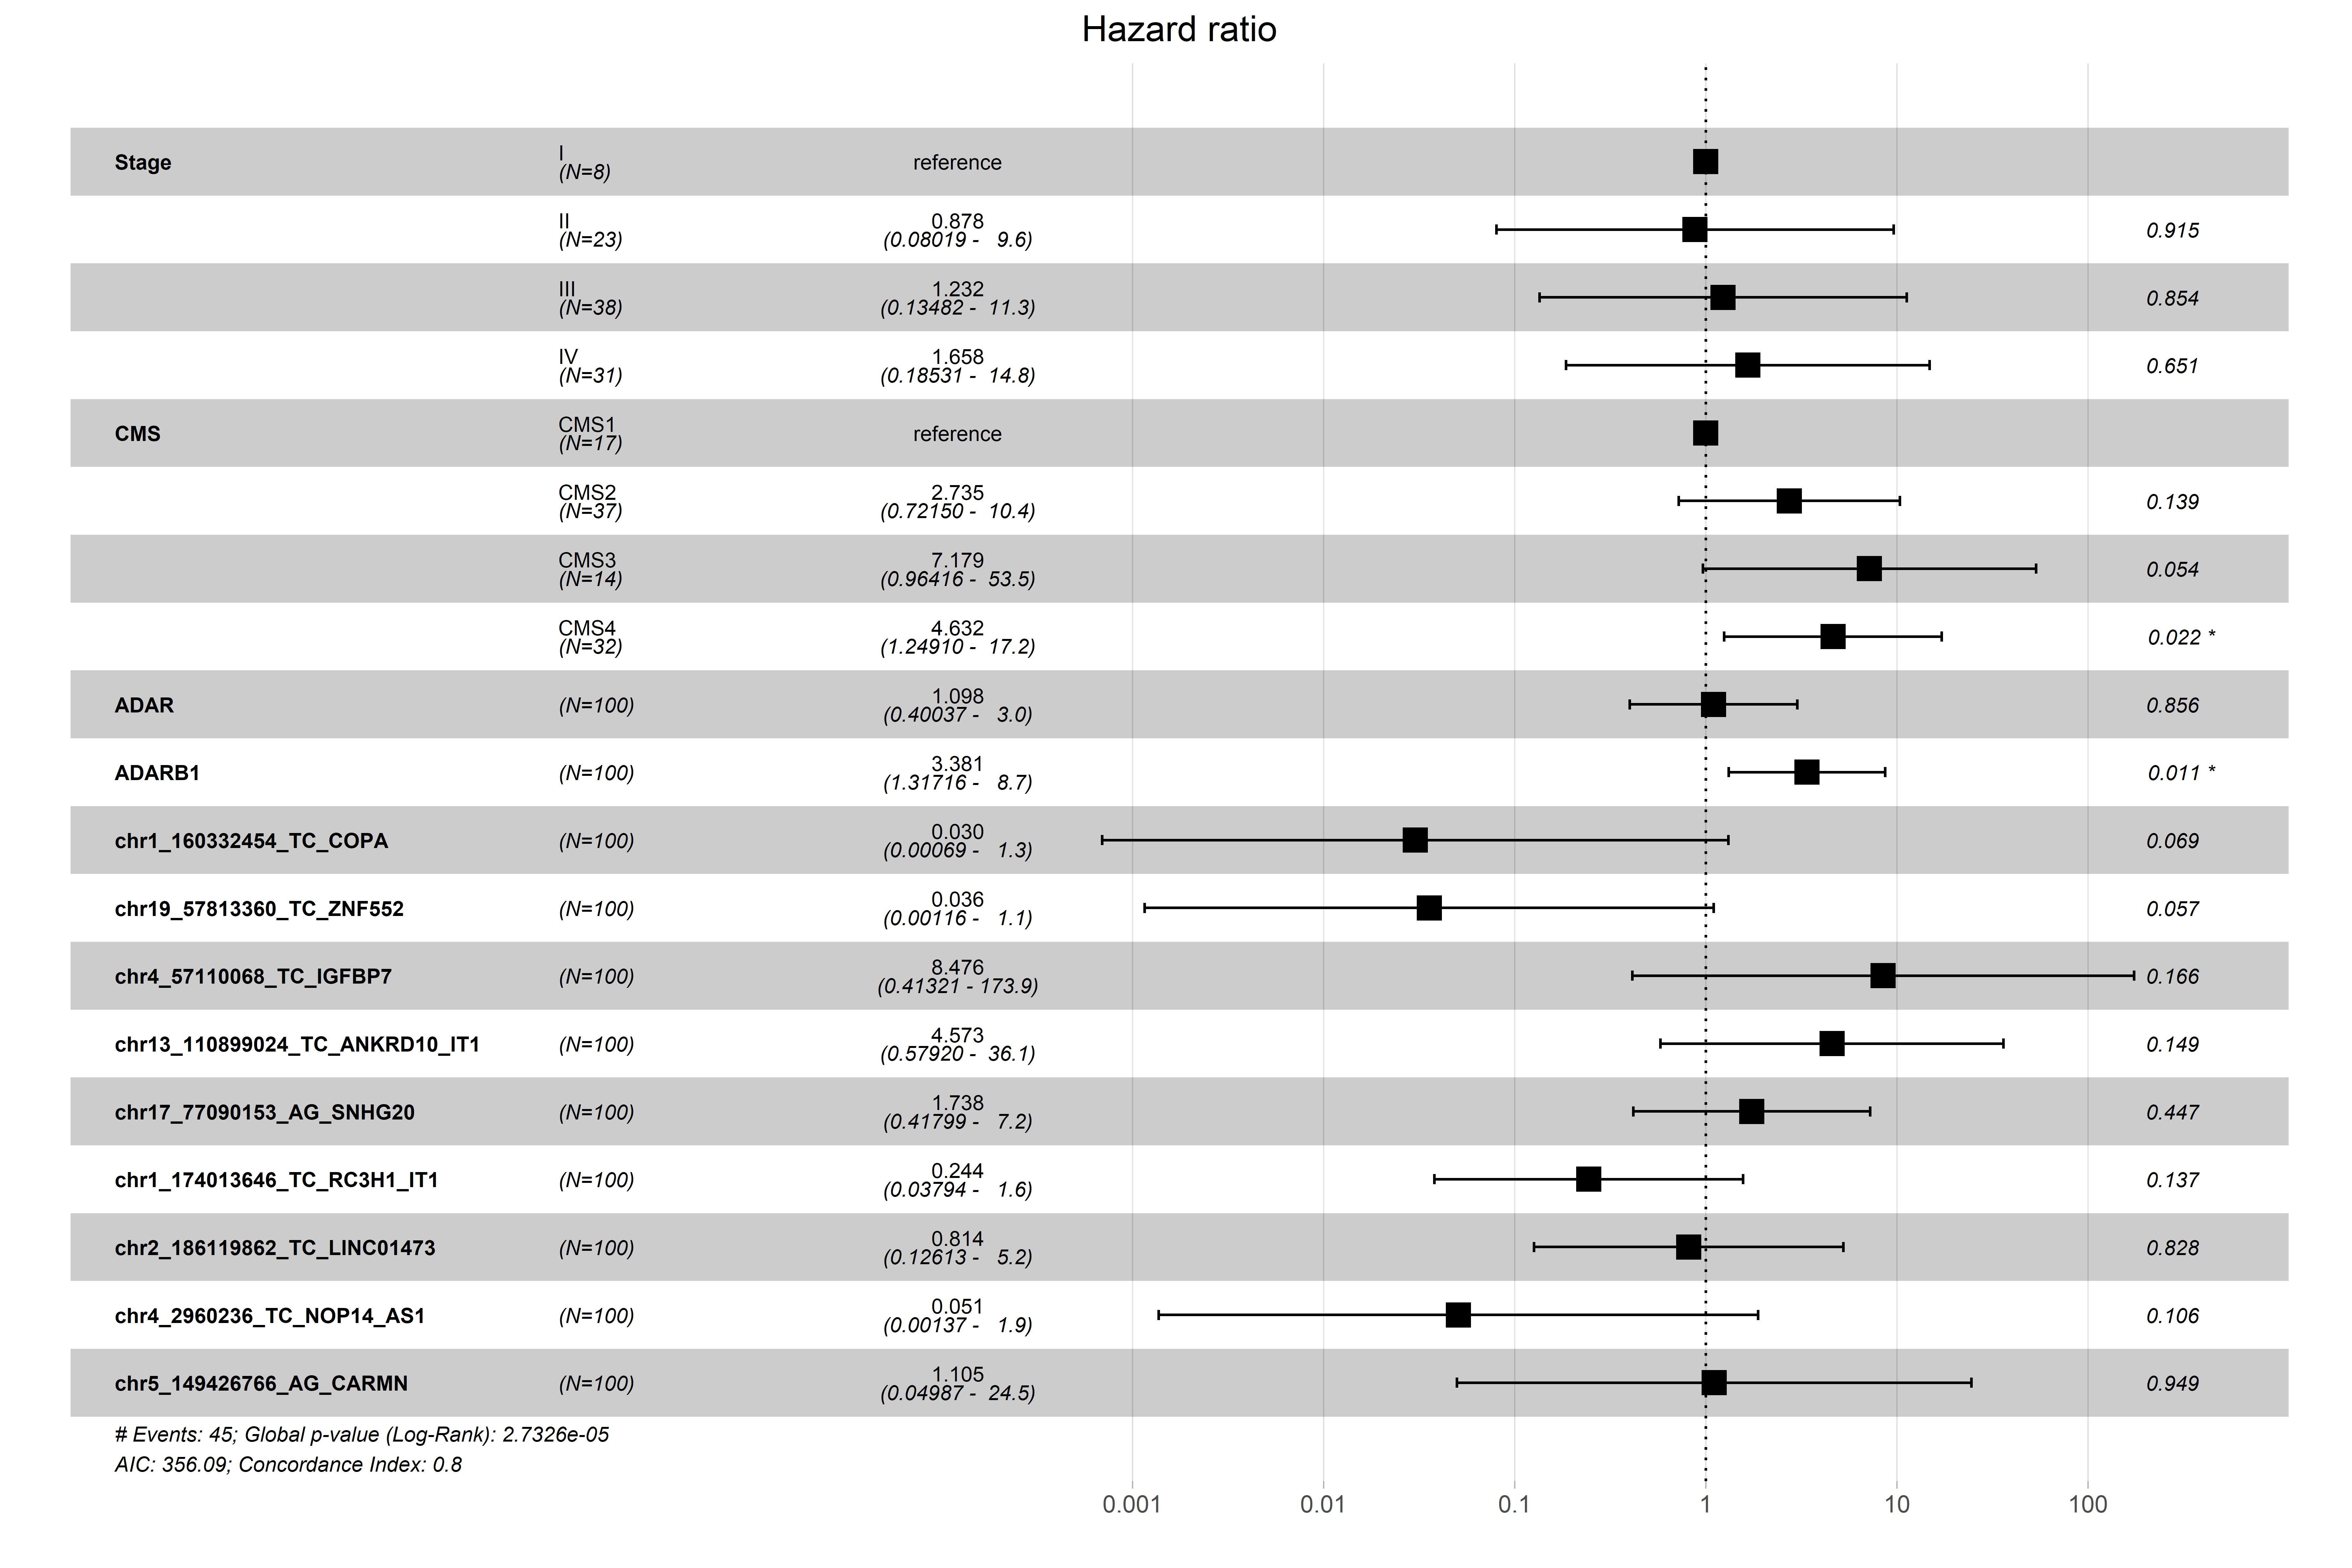


Supplementary 18 Multivariate Cox proportional hazards model based on features selected only variables that present a r < |0.6|.


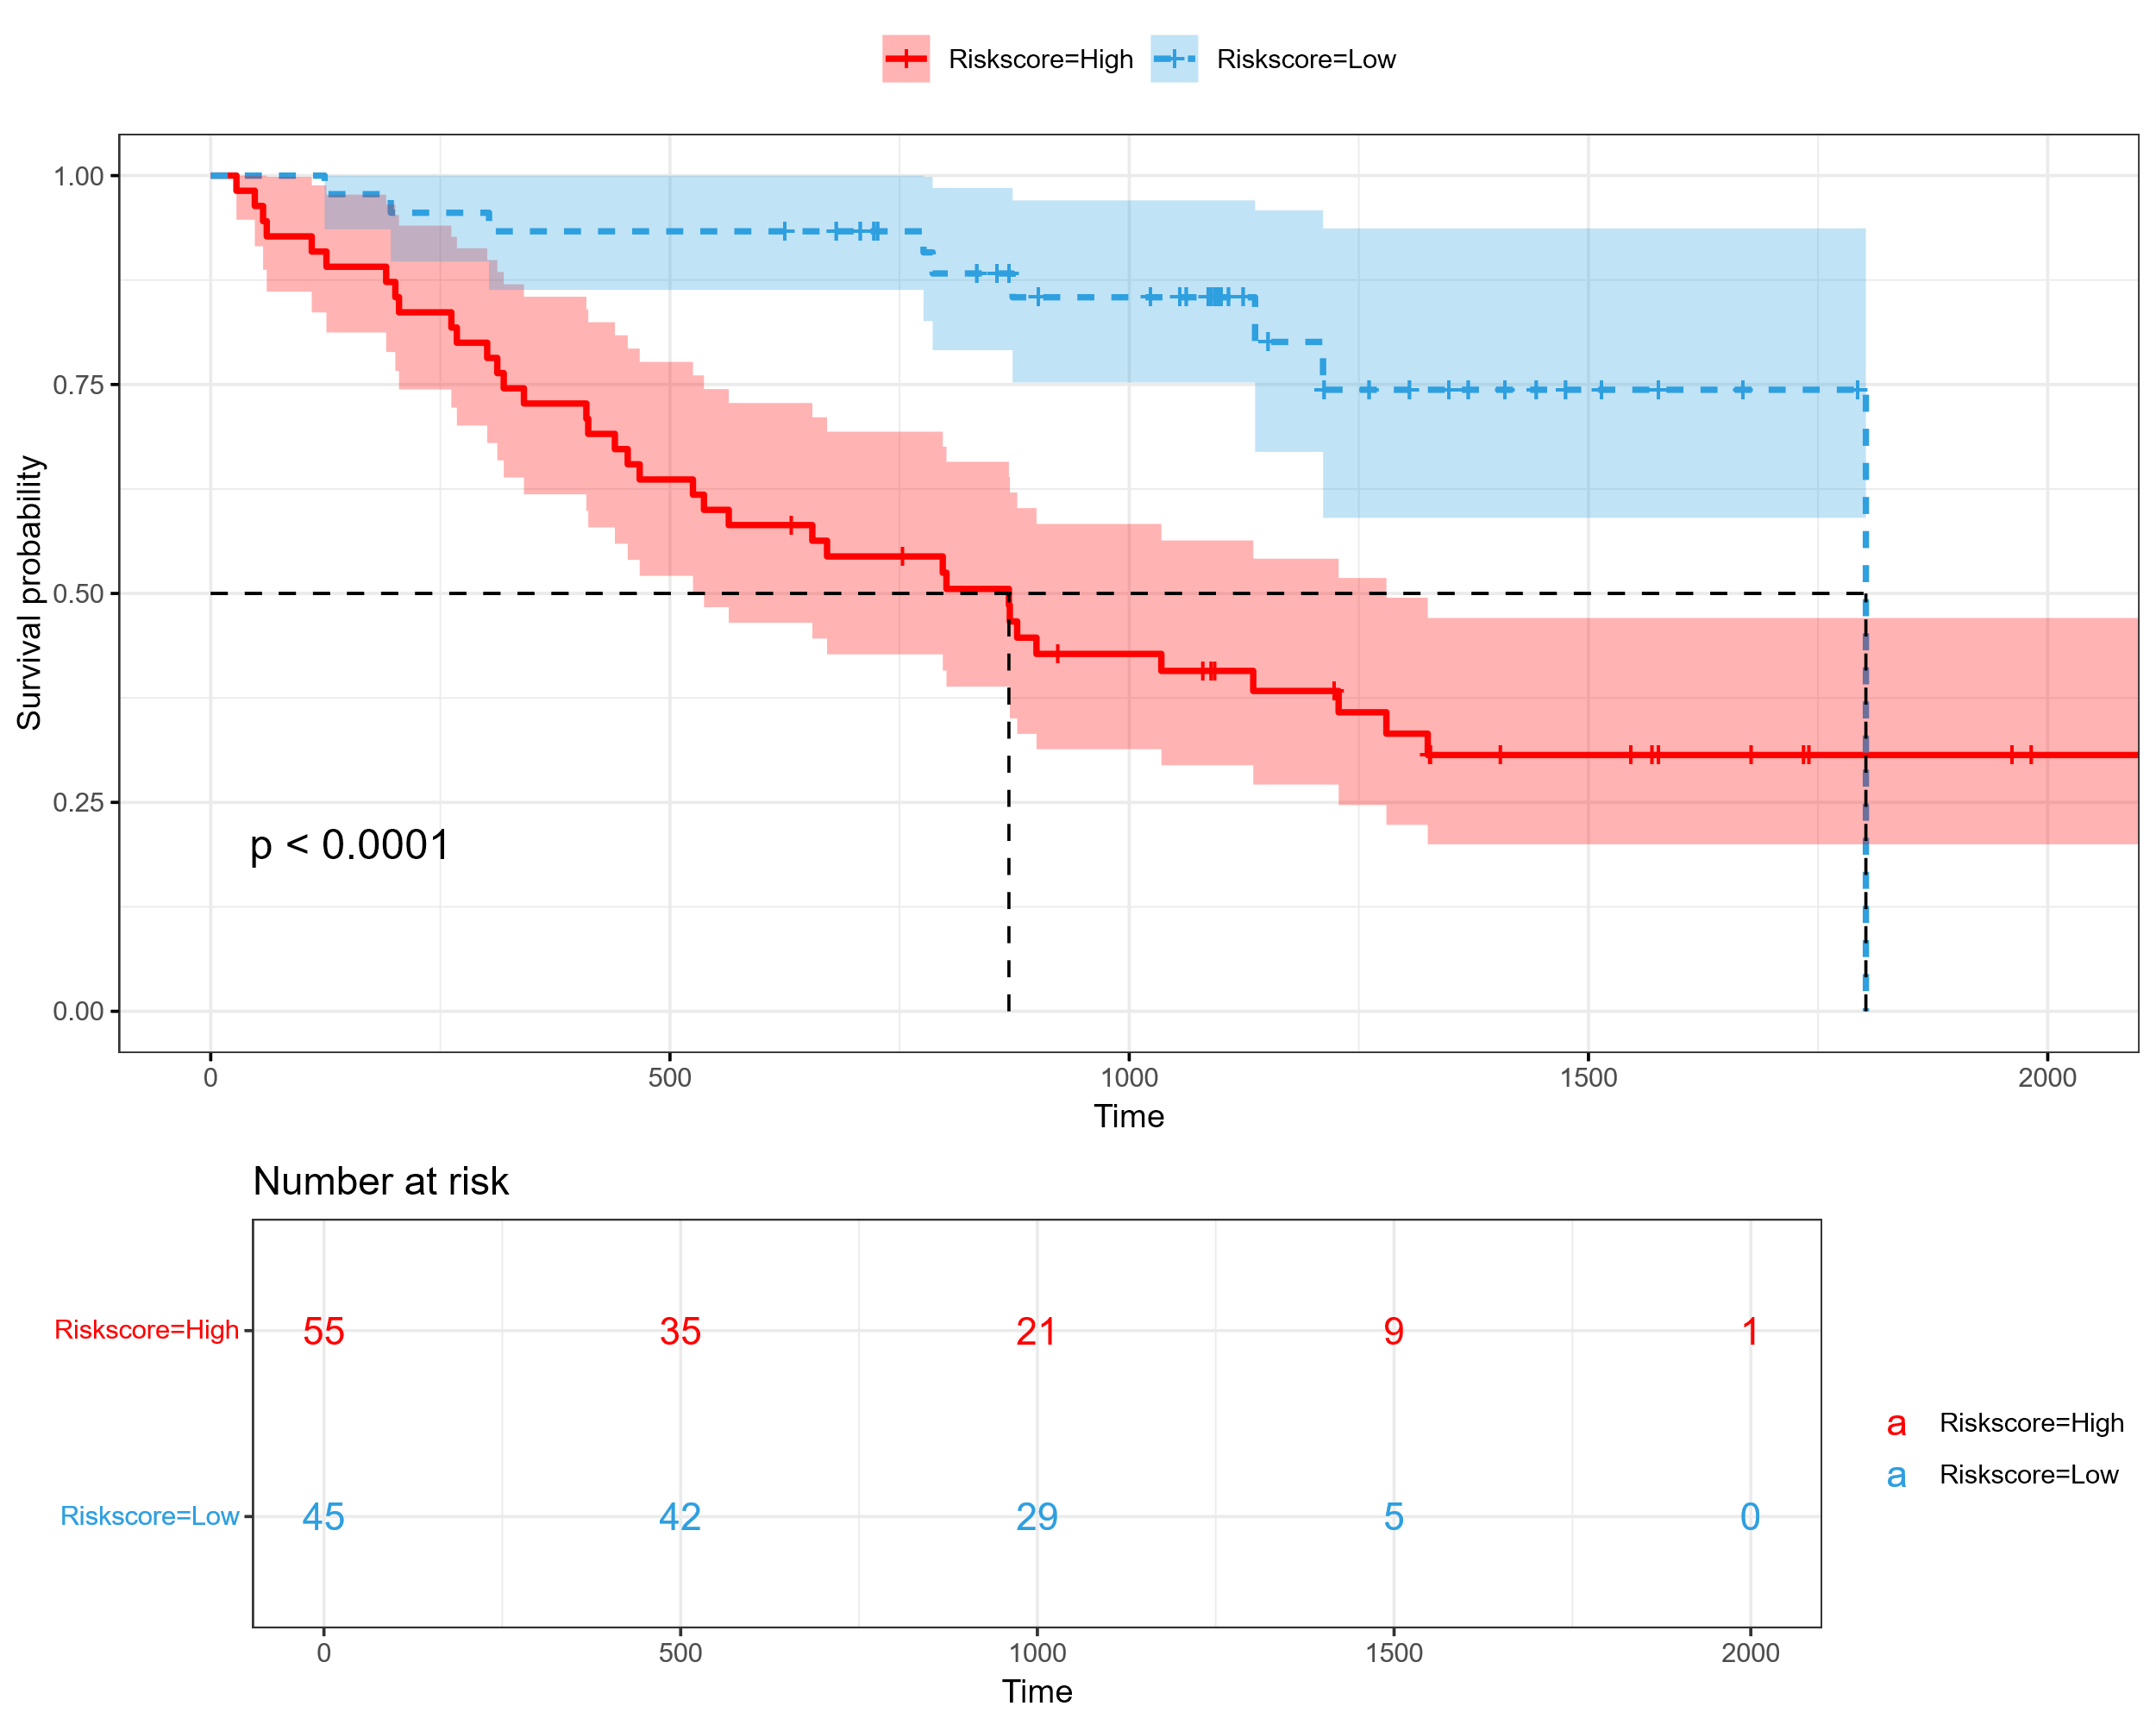


Supplementary 19 illustrates the Kaplan–Meier survival curves stratified by risk score derived from the multivariate Cox model.

*Feature Selection: Lasso methods:*


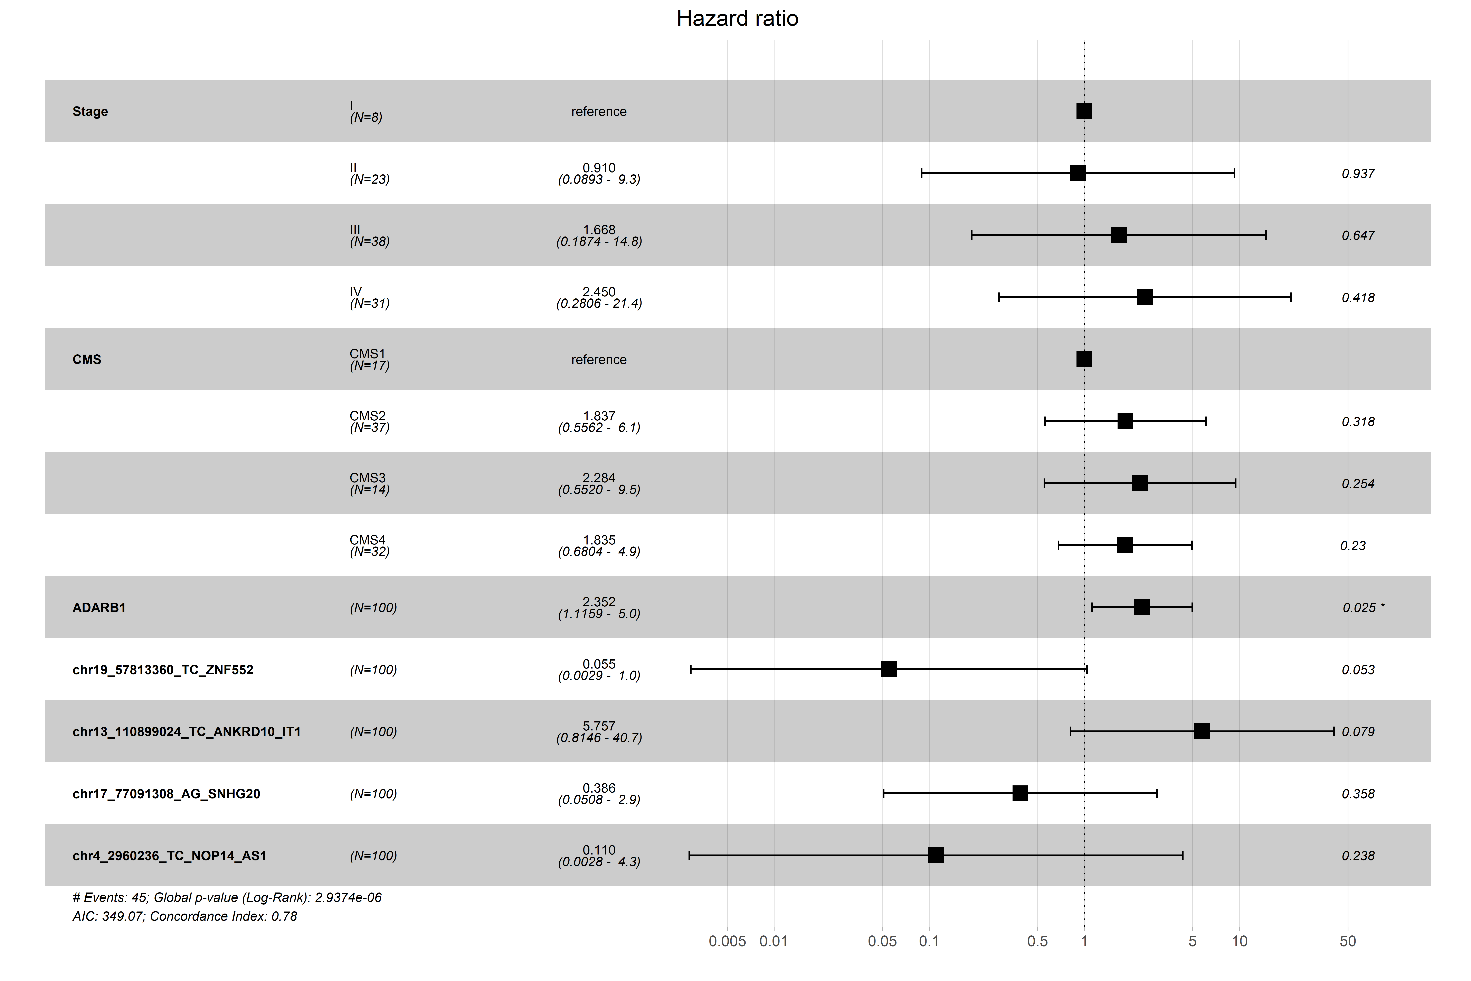


Supplementary 20 Multivariate Cox proportional hazards model based on features selected by Lasso Selection.


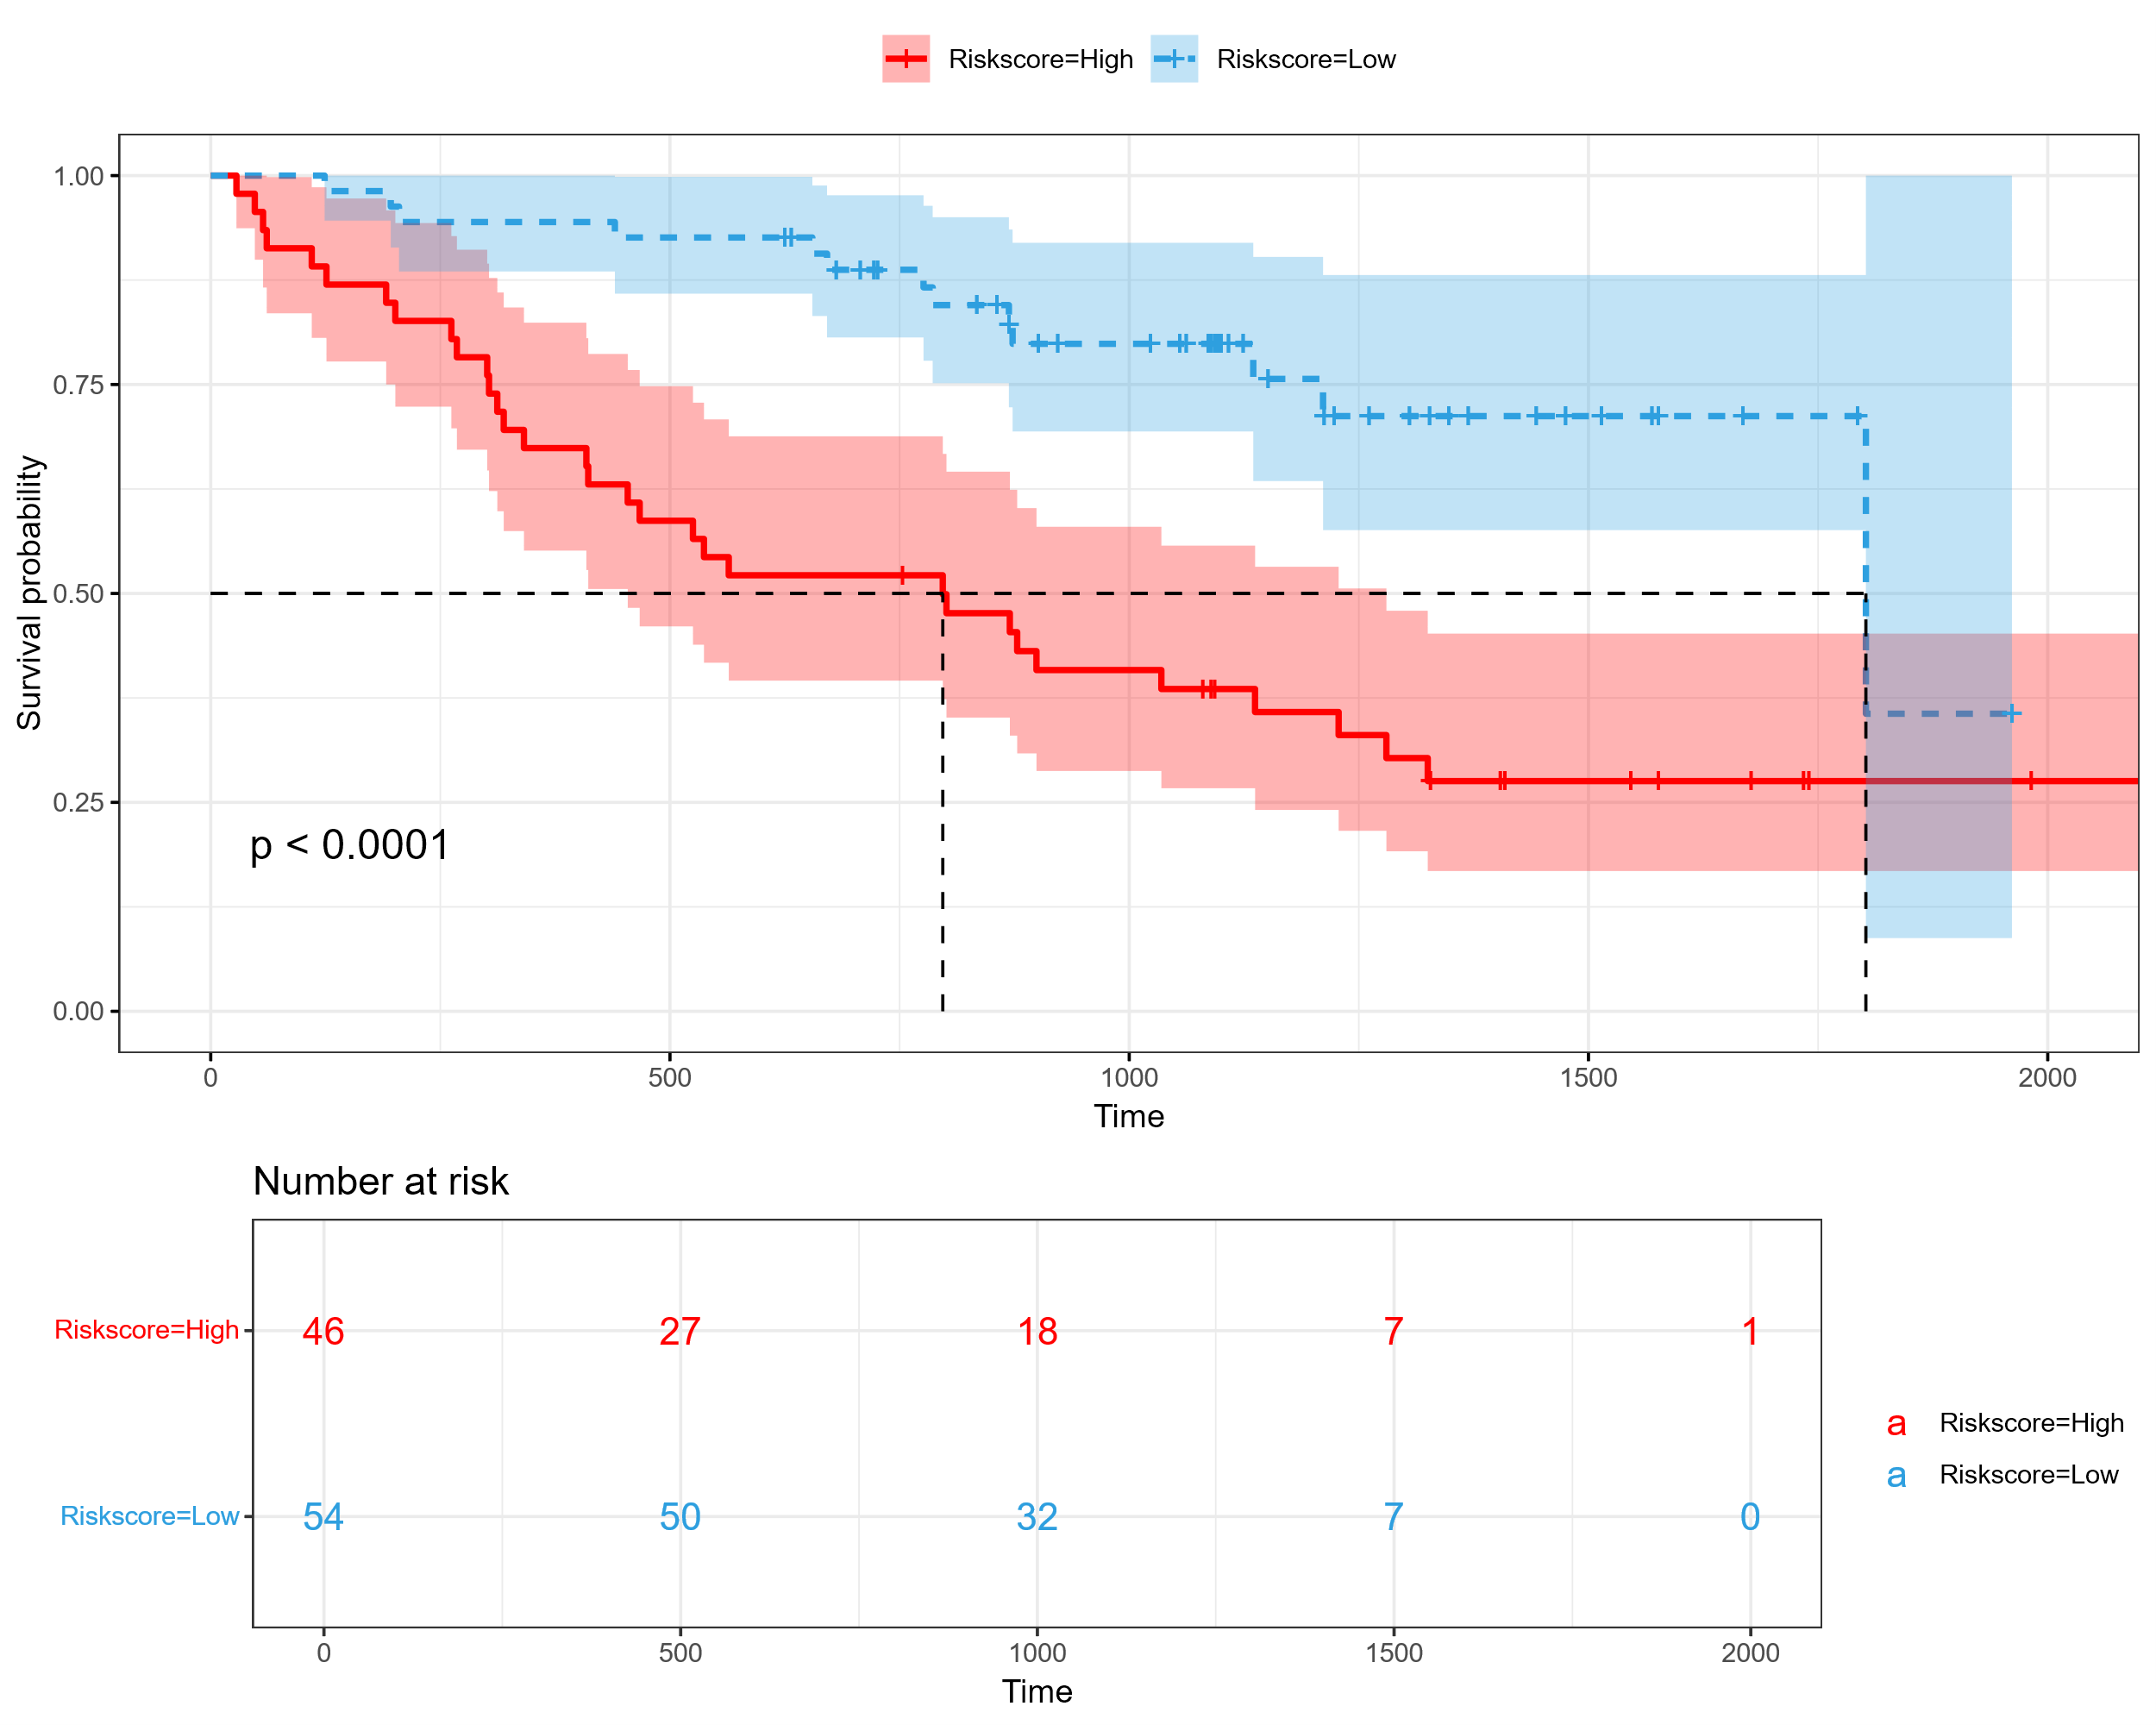


Supplementary 21 illustrates the Kaplan–Meier survival curves stratified by risk score derived from the multivariate Cox model.
